# 1 **Noninvasive diagnosis of secondary infections in COVID-19 by sequencing of plasma microbial cell-** 2 **free DNA.**

3  
4 Grace Lisius<sup>1</sup>, Radha Duttagupta<sup>2</sup>, Asim A. Ahmed<sup>2</sup>, Matthew Hensley<sup>3</sup>, Nameer Al-Yousif<sup>4</sup>, Michael Lu<sup>1</sup>,  
5 William Bain<sup>3,5,6</sup>, Faraaz Shah<sup>3,5</sup>, Caitlin Schaefer<sup>3,5</sup>, Shulin Qin<sup>3,7</sup>, Xiaohong Wang<sup>3</sup>, Yingze Zhang<sup>3,5</sup>, Kevin J.  
6 Mitchell<sup>8</sup>, Ellen K. Hughes<sup>8</sup>, Jana L. Jacobs<sup>9</sup>, Asma Naqvi<sup>9</sup>, Ghady Haidar<sup>9</sup>, John W. Mellors<sup>9</sup>,  
7 Barbara Methé<sup>3,7</sup>, Bryan J. McVerry<sup>3,5,7</sup>, Alison Morris<sup>3,7</sup>, Georgios D. Kitsios<sup>3,5,7</sup>

8  
9 <sup>1</sup>Internal Medicine Residency Program, UPMC, Pittsburgh, PA;

10 <sup>2</sup>Karius Inc, Redwood City, CA;

11 <sup>3</sup>Division of Pulmonary, Allergy and Critical Care Medicine, University of Pittsburgh, Pittsburgh, PA;

12 <sup>4</sup>Internal Medicine Residency Program, UPMC Mercy, Pittsburgh, PA;

13 <sup>5</sup>Acute Lung Injury Center for Excellence, Division of Pulmonary, Allergy and Critical Care Medicine, University  
14 of Pittsburgh, Pittsburgh, PA;

15 <sup>6</sup>Veterans Affairs Pittsburgh Health System, Pittsburgh, PA;

16 <sup>7</sup>Center for Medicine and the Microbiome, University of Pittsburgh, Pittsburgh, PA;

17 <sup>8</sup>Computer Vision Group, Veytel LLC, Pittsburgh, PA;

18 <sup>9</sup>University of Pittsburgh School of Medicine, Division of Infectious Diseases, Pittsburgh, PA.

19  
20 Corresponding Author:

21 Georgios D. Kitsios, MD, PhD

22 Assistant Professor of Medicine

23 Division of Pulmonary, Allergy and Critical Care Medicine

24 University of Pittsburgh Medical Center

25 Address: UPMC Montefiore Hospital, NW628, 3459 Fifth Avenue, Pittsburgh, PA 15213

26 Email: [kitsiosg@upmc.edu](mailto:kitsiosg@upmc.edu)

27 **Summary of conflict-of-interest statements:** Drs. Duttagupta and Ahmed are employed by Karius, Inc. Dr.

28 Kitsios, Dr. Haidar have received research funding from Karius, Inc in 2018-2019. Dr. Mellors is a consultant to

29 Gilead Sciences and owns shares or share options in Co-Crystal Pharmaceuticals, ID Connect, and Abound  
30 Bio, all unrelated to the current work. Dr. McVerry has received research funding from Bayer Pharmaceuticals,  
31 Inc. and consulting fees from Boehringer Ingelheim, both unrelated to this work. All other authors disclosed no  
32 conflict of interest.

33 **Funding information:** Dr. Kitsios: University of Pittsburgh Clinical and Translational Science Institute, COVID-  
34 19 Pilot Award; NIH (K23 HL139987; R03 HL162655). Dr. Bain: Career Development award number IK2  
35 BX004886 from the U.S. Department of Veterans Affairs Biomedical Laboratory R&D (BLRD) Service. Caitlin  
36 Schaefer: NIH (P01 HL114453).

37 **Abstract:**

38 Background: Secondary infection (SI) diagnosis in COVID-19 is challenging, due to overlapping clinical  
39 presentations, practical limitations in obtaining samples from the lower respiratory tract (LRT), and low  
40 sensitivity of microbiologic cultures.

41 Research Question: Can metagenomic sequencing of plasma microbial cell-free DNA (mcfDNA-Seq) help  
42 diagnose SIs complicating COVID-19?

43 Study Design and Methods: We enrolled 42 inpatients with COVID-19 classified as microbiologically-confirmed  
44 SI (Micro-SI, n=8), clinically-diagnosed SI (Clinical-SI, n=13, i.e. empiric antimicrobials), or no clinical suspicion  
45 for SI (No-Suspected-SI, n=21) at time of enrollment. From baseline and follow-up plasma samples (days 5  
46 and 10 post-enrollment), we quantified mcfDNA for all detected microbes by mcfDNA sequencing and  
47 measured nine host-response biomarkers. From LRT samples among intubated subjects, we quantified  
48 bacterial burden with 16S rRNA gene quantitative PCR.

49 Results: We performed mcfDNA-Seq in 82 plasma samples. Sequencing was successful in 60/82 (73.2%)  
50 samples, which had significantly lower levels of human cfDNA than failed samples ( $p<0.0001$ ). McfDNA  
51 detection was significantly higher in Micro-SI (15/16 [94%]) compared to Clinical-SI samples (8/14 [57%],  
52  $p=0.03$ ), and unexpectedly common in No-Suspected-SI samples (25/30 [83%]), similar to detection rate in  
53 Micro-SI. We detected culture-concordant mcfDNA species in 13/16 Micro-SI samples (81%) and mcfDNA  
54 levels tracked with SI outcome (resolution or persistence) under antibiotic therapy. McfDNA levels correlated  
55 significantly with LRT bacterial burden ( $r=0.74$ ,  $p=0.02$ ) as well as plasma biomarkers of host response (white  
56 blood cell count, IL-6, IL-8, and SPD, all  $p<0.05$ ). Baseline mcfDNA levels were predictive of worse 90-day  
57 survival (hazard ratio 1.30 [1.02-1.64] for each  $\log_{10}$  mcfDNA,  $p=0.03$ ).

58 Interpretation: High circulating levels of mcfDNA in a substantial proportion of patients with COVID-19 without  
59 clinical suspicion for SI suggest that SIs may often remain undiagnosed. McfDNA-Seq, when clinically  
60 available, can offer a non-invasive diagnostic tool for pathogen identification, with prognostic value on host  
61 inflammatory response and clinical outcomes.

62 **Key Words:** COVID-19, microbial cell-free DNA sequencing, secondary infection, pneumonia, acute  
63 respiratory failure

64 **Introduction:**

65 Secondary bacterial or fungal infections complicate the course of up to 50% of hospitalized patients  
66 with COVID-19 and contribute to worse clinical outcomes.<sup>1-3</sup> Diagnosis of secondary infections (SI) has  
67 presented clinicians with major challenges during the pandemic. Readily available indicators of clinical infection  
68 such as fever, leukocytosis or consolidations on chest imaging cannot distinguish isolated SARS-CoV-2  
69 infection from a secondary pneumonia by super-infecting organisms.<sup>4,5</sup> Blood cultures are obtained routinely  
70 when a SI is suspected in COVID-19, but their diagnostic yield is low, especially in the case of secondary  
71 pneumonias, when direct lower respiratory tract (LRT) sampling is recommended.<sup>6</sup> LRT sampling for  
72 microbiologic studies can be challenging, such as in severely hypoxemic patients on non-invasive respiratory  
73 support, and can have low diagnostic sensitivity, due to antecedent antibiotics or slow/fastidious organism  
74 growth, as in the case of fungal pathogens.<sup>7</sup>

75 The challenges of SI diagnostic work-up and variable clinical practices have hindered acquisition of  
76 accurate SI incidence estimates in severely ill patients with COVID-19. With the prevailing diagnostic  
77 uncertainty, empiric antibiotics have been prescribed in 75-85% of hospitalized patients, often initiated due to  
78 clinical deterioration and then empirically continued, even in the absence of diagnostic evidence supporting an  
79 SI.<sup>8,9</sup> Overcoming the diagnostic challenges of SI with reliable, sensitive and non-invasive techniques could  
80 optimize diagnostic yield, enabling antibiotic targeting and stewardship.<sup>4</sup>

81 Metagenomic sequencing of plasma microbial cell-free DNA (mcfDNA) can offer a non-invasive,  
82 sensitive diagnostic tool for SIs caused by DNA pathogens. Plasma metagenomics in sepsis provides rapid  
83 and actionable results, with 95% concordance with blood-cultured organisms, facilitating adjustments of  
84 empiric antimicrobials to targeted therapy.<sup>10</sup> We have previously provided proof-of-concept evidence that  
85 patients with COVID-19 with high levels of circulating mcfDNA of common respiratory pathogens were at risk of  
86 worse clinical outcome.<sup>11</sup> Although the ability to comprehensively assess for SI-causal pathogens with non-  
87 invasive blood samples is appealing, feasibility and clinical validity data for mcfDNA sequencing in COVID-19  
88 are needed. In this study, we report the analyses of a cohort of 42 hospitalized patients with severe COVID-19  
89 who were comprehensively screened for SI pathogens with serial plasma mcfDNA sequencing.

90  
91 **Methods:**

92 Clinical cohort enrollment and COVID-19 diagnosis: From April 2020 through September 2020, we

93 conducted an observational, prospective cohort study of hospitalized patients with acute hypoxemic respiratory  
94 failure and confirmed severe COVID-19 pneumonia as previously described.<sup>12,13</sup> The University of Pittsburgh  
95 Institutional Review Board (IRB) approved the protocols and we obtained written or electronic informed  
96 consent by all participants or their surrogates in accordance with the Declaration of Helsinki. We diagnosed  
97 COVID-19 based on institutional clinical criteria (clinical symptoms, hypoxemia and abnormal chest  
98 radiographic findings) with confirmatory molecular testing (positive SARS-CoV-2 nasopharyngeal quantitative  
99 polymerase chain reaction [qPCR]).

100 Biospecimen collection and experiments: We collected blood samples in EDTA tubes on enrollment  
101 (baseline - day 1) for centrifugation, separation and storage of plasma and additional blood constituents until  
102 conduct of experiments. We also collected repeat blood samples on days 5 and 10 post-enrollment from  
103 critically ill patients who remained hospitalized in the intensive care unit (ICU). We collected endotracheal  
104 aspirates (ETA) from mechanically-ventilated patients concurrently with blood sample acquisition.

105 We conducted plasma microbial cell-free DNA metagenomic sequencing (mcfDNA-Seq) with the Karius  
106 Test<sup>®</sup> [Karius Inc., Redwood City, CA] and classified the derived metagenomic sequences as human (hcfDNA)  
107 vs. microbial (mcfDNA). Based on minimum sequencing coverage metric required for quality control, we  
108 classified sequencing runs as “Pass”, “Qualitatively Pass” or “Failed”. All microbes were reported at species  
109 level and included a quantitative measure of abundance expressed as DNA molecules per microliter (MPMs),  
110 with the exception of the “Qualitative Pass” calls where the reported organism could not be quantified. We  
111 classified microbes identified by mcfDNA-Seq into recognized respiratory pathogens vs. microbes of unclear  
112 clinical importance.<sup>14</sup> For contextualization, we compared mcfDNA levels among subjects with COVID-19 with  
113 our previously published dataset of mechanically ventilated patients with and without pneumonia.<sup>14</sup>

114 To profile the host response, we measured plasma levels of nine prognostic biomarkers (eight  
115 interleukin [IL]-6, IL-8, pentraxin-3, procalcitonin, receptor for advanced glycation end products [RAGE],  
116 angiopoietin-2 (Ang-2), suppression of tumorigenicity [ST]-2, and tumor necrosis factor receptor [TNFR]-1 with  
117 Luminex, and surfactant Protein D [SPD] with ELISA; R&D Systems, Minnesota). We measured plasma SARS-  
118 CoV-2 viral levels (vRNA) following RNA extraction and qPCR amplification with a sensitive in-house method.<sup>15</sup>  
119 From available ETA samples, we separately extracted genomic DNA and RNA and performed bacterial 16S

rRNA gene and SARS-CoV-2 RNA qPCR for assessment of bacterial and viral load in the LRT, respectively.<sup>5,16</sup>

### Diagnosis and classification of secondary infections:

We reviewed all available clinical, microbiologic and antimicrobial treatment data around the timing of baseline samples (+/- 3 days) for patients with COVID-19 to ascertain the presence/absence or clinical suspicion for SI. We classified subjects in three groups, assessed by two reviewers:

- a. Microbiologically-Confirmed Secondary Infection (**Micro-SI**), when typical pathogenic microbes were isolated on clinical biospecimen cultures (blood, LRT, urine or tissue) and the subject was receiving antimicrobials for the documented infection.
- b. Clinically-Diagnosed Secondary Infections (**Clinical-SI**), when empiric antimicrobials were administered without microbiologic SI confirmation.
- c. “No Clinical Suspicion for SI” (**No-Suspected-SI**), when microbiologic workup for SI was negative or not performed, and no empiric antimicrobials were prescribed.

We repeated classifications into the Micro-SI, Clinical-SI and No-Suspected-SI categories at the timing of follow-up samples (days 5 and 10 post-enrollment) from updated clinical and microbiologic data, when available. We quantified radiographic edema of baseline chest x-rays with the Radiographic Assessment of Lung Edema (RALE) score with the use of the *PulmAnnotator* software.<sup>17,18</sup>

### Statistical analysis:

For “Pass” samples with zero microbial calls, we assigned a microbial MPM of “1” to allow for log<sub>10</sub>-transformations, and utilized log<sub>10</sub>-transformed values of plasma biomarkers and mcfDNA levels for analyses due to non-normal data. We compared clinical variables, biomarker and cfDNA levels between different categories (i.e. sequencing run success, SI clinical groups) and the historical non-COVID-19 cohort using non-parametric tests, Wilcoxon signed-rank and Fischer’s exact tests. We examined for correlations between biomarkers and cfDNA levels with the Pearson’s method, adjusted for multiple comparisons with the Benjamini-Hochberg method. We analyzed the impact of baseline mcfDNA levels on 90-day survival by Kaplan-Meier curves stratified by total mcfDNA tertiles and by constructing Cox proportional age-adjusted hazards models. We performed all analyses with the R software (R version 3.5.1).

148

149 **Results:**

150 Clinical cohort characteristics:

151 We included 42 patients (median age 65.1 years, 62% men), who contributed a total of 82 plasma  
152 samples for cfDNA sequencing (median of 2 samples per subject). From available baseline data, we classified  
153 subjects as Micro-SI (n=8), Clinical-SI (n=13) and No-Suspected-SI (n=21) (Table 1). We found lower rates of  
154 invasive mechanical ventilation ( $p = 0.05$ ) and lower total white blood cell count ( $p=0.04$ ) in Clinical-SI patients  
155 and no other significant clinical variable differences between SI groups. Plasma vRNA was notably lower in  
156 Micro-SI ( $p\leq 0.05$ ). In biomarker comparisons, we found significant between-group differences in IL-8 and Ang-  
157 2 levels (lower in Clinical-SI).

158

159 Outputs of plasma metagenomic sequencing runs:

160 Based on the sequencing run success criteria of the 82 samples, we classified 52 (63%) as “Pass”  
161 (successful), eight (10%) as “Qualitative Pass” and 22 samples (27%) as “Fail”. “Pass” samples had  
162 significantly lower levels of hcfDNA compared to “Qualitative Pass”, or “Fail” samples ( $p<0.0001$ , e-Figure 1).  
163 We also found that a successful sequencing run (“Pass”) on a Day 1 sample for a given subject was  
164 significantly associated with a “Pass” run on a Day 5 sample (Fisher’s odds ratio 11.9, 95% confidence  
165 interval-CI [1.00-703.8],  $p=0.04$ ). From “Qualitative Pass” samples, we utilized only qualitative information  
166 about identified microbial species, whereas we utilized quantitative mcfDNA data (expressed as MPMs) from  
167 “Pass” samples only.

168

169 Plasma metagenomics results by SI category:

170 Among the 53 “Pass” samples across all time-points, Micro-SI diagnosis had more samples positive for  
171 mcfDNA (i.e. DNA reads from at least one microbial species reported, 15/16 [94%] samples) compared to  
172 Clinical-SI (8/14 [57%],  $p=0.03$ ). Unexpectedly, a high proportion of No-Suspected-SI samples were positive  
173 for mcfDNA (25/30 [83%]), similar to Micro-SI samples. All eight “Qualitative Pass” samples, one Clinical-SI  
174 and seven No-Suspected-SI, were positive for mcfDNA, with 3/8 samples reporting  $\geq 2$  microbial species.

175 Among baseline “Pass” samples (n = 25), 18 (72%) were positive for mcfDNA, with a median  
176 (interquartile range – IQR) of 812.9 (151.3-2435.5) MPMs per sample, 59.1% of which corresponded to typical  
177 pathogenic organisms. Stratified by SI categories, 4/5 (80.0%) Micro-SI, 3/8 (37.5%) Clinical-SI and 11/12  
178 (91.6%) No-Suspected-SI samples were positive for mcfDNA, with a statistically significant higher proportion of  
179 positive samples in No-Suspected-SI compared to Clinical-SI samples (Fisher’s p=0.01). We found no  
180 significant differences in hcfDNA, total mcfDNA and pathogen mcfDNA MPMs between SI groups (Figure 1A-  
181 C), although Micro-SI samples had numerically higher total and pathogen mcfDNA MPM levels (Table 1).

182 Among baseline “Pass” samples in Micro-SI subjects, plasma metagenomics reported mcfDNA from  
183 the culprit organisms identified by cultures in 3/5 (60.0%) cases (*E.coli* in subject 4, *Pseudomonas aeruginosa*  
184 in subject 3 and *Proteus mirabilis* in subject 6) (e-Figure 2, eTable 2). The two discordant Micro-SI samples  
185 involved two probable ventilator-associated pneumonia (VAP) cases: subject 1 with negative mcfDNA-Seq  
186 when LRT cultures taken three days prior to plasma sampling showed rare *E.coli* growth, and case subject 2  
187 with light Methicillin-sensitive *S. aureus* growth in LRT cultures taken two days prior to plasma sampling was  
188 deemed as culprit, but mcfDNA-Seq reported *E. faecalis* and *E.coli* mcfDNA. When considering all available  
189 Micro-SI samples (five baseline and 11 follow-up samples), mcfDNA-Seq results were concordant with cultures  
190 in 13/16 (81.3%) of comparisons.

191 Baseline samples from Clinical-SI subjects contained mcfDNA in 37.5 % of cases (3/8). Case 11 had  
192 high mcfDNA levels for plausible pathogens (*K. pneumoniae* and *P. aeruginosa*; Figure 1C, e-Figure 2, and  
193 eTable 2), which had not been detected by blood cultures (no LRT specimen cultures available). For the other  
194 two Clinical-SI subjects (15 and 21), reported mcfDNA belonged mostly to Human Herpesviruses, which could  
195 represent viral re-activation in context of critical illness.<sup>19</sup>

196 Among No-Suspected-SI patients at baseline, 11/12 (91.6%) samples were positive for mcfDNA, with  
197 five samples showing >100 pathogen mcfDNA MPMs in the range of Micro-SI subjects (annotated species in  
198 Figure 1C, e-Figure 2). The remaining six subjects with mcfDNA revealed organisms of unclear clinical  
199 significance: Herpesvirus DNA in four subjects (27, 28, 38 and 42), and gram-positive bacteria often  
200 considered as skin contaminants in blood cultures (*Lactobacillus gasseri* and *S. epidermidis*) in three subjects  
201 (38, 41 and 42). Notably, 3/4 (75%) of the baseline “Qualitative Pass” samples for No-Suspected-SI subjects



(25, 30, 36) were also positive for pathogen mcfDNA, even though the absolute burden of mcfDNA MPMs could not be reliably estimated.

#### Comparison of circulating cfDNA burden in COVID-19 vs. historic non-COVID samples:

Comparing against published data from our group for mechanically ventilated patients with microbiologically confirmed pneumonia (n=26), clinically diagnosed pneumonia (n=41) and uninfected controls (n=16, intubated for airway protection or due to cardiogenic pulmonary edema), we found markedly higher levels of hcfDNA in subjects with COVID-19 compared to all non-COVID patient groups (e-Figure 3A,  $p < 0.005$  for all comparisons). Patients without COVID with microbiologically confirmed pneumonia had higher mcfDNA levels compared to No-Suspected-SI in patients with COVID-19, who in turn had markedly higher mcfDNA levels compared to uninfected controls (e-Figure 3B-C, all  $p < 0.05$ ).

#### Trajectories of plasma cfDNA levels in subjects with COVID-19:

We updated SI classifications at the time of the follow-up sample acquisition and found that few subjects transitioned into a different SI diagnostic category (4/26 [15%] and 4/16 [25%] for days 5 and 10, respectively, e-Figure 4, 5). Micro-SI subjects had significantly higher total and pathogen mcfDNA levels compared to No-Suspected-SI subjects at post-enrollment day 5 ( $p < 0.05$ , e-Figure 5).

We examined subject-level trajectories in four cases with persistent culture-proven SI or persistent pathogen mcfDNA detection on available longitudinal samples (Figure 2). Subject 3 was diagnosed with resistant *Pseudomonas aeruginosa* VAP with clinical and microbiologic relapse, demonstrating persistently elevated *Pseudomonas aeruginosa* mcfDNA for >30 days on repeated sampling (Figure 2). For subject 4 McfDNA-Seq demonstrated a transition in detected bacterial species in follow-up samples corresponding to two different VAP episodes (by *E. coli* and *Pseudomonas aeruginosa* respectively). Subject 6 had unexplained, persistent *Proteus mirabilis* mcfDNA detection following treatment of a urinary tract infection, but was found to have a late parotid gland abscess that was drained and cultures grew *Proteus mirabilis*. Last, for subject 26 diagnosed as No-Suspected-SI (i.e. no empiric antimicrobials) who died on day 6 with multi-organ failure attributed to isolated SARS-CoV-2 infection, we found high pathogen mcfDNA levels, including *Klebsiella pneumoniae*, raising concern for the possibility of an undetected and undertreated SI.

230

231 McfDNA is associated with plasma host-response biomarkers and LRT bacterial burden:

232 We next examined the relationship between mcfDNA-Seq results and clinical/laboratory parameters of  
233 COVID-19 severity. We found no significant correlation between mcfDNA and SARS-CoV-2 viral load (plasma  
234 and ETA vRNA), radiographic severity (quantified by RALE scores) or clinical severity by WHO ordinal scale.  
235 However, there was a weak, significant correlation between hcfDNA and RALE scores ( $r=0.33$ ,  $p=0.03$ ).

236 We then examined for correlations between cfDNA levels and host-response biomarkers measured in  
237 plasma. Total and pathogen mcfDNA levels were significantly correlated with IL-6, IL-8 and SPD levels,  
238 whereas hcfDNA levels were significantly correlated with IL-6, IL-8, pentraxin-3 and procalcitonin levels  
239 following adjustment for multiple comparisons (Figure 3). Pathogen mcfDNA levels were significantly correlated  
240 with 16S rRNA gene copies by qPCR in ETA specimens, a surrogate of LRT bacterial load ( $r=0.92$ ,  $p=0.0004$ ).

241

242 Baseline mcfDNA levels are predictive of 90-day survival:

243 Baseline hcfDNA and total mcfDNA levels were not significantly associated with cumulative mortality at  
244 90 days from ICU admission (Figure 4A-B). However, baseline total mcfDNA levels were significantly  
245 associated with worse 90-day survival in a Cox proportional hazards model adjusted for age (hazard ratio for  
246  $\log_{10}$ -transformed mcfDNA 1.30, [1.02-1.64],  $p=0.03$ ). Stratified by baseline total mcfDNA tertiles (high>1499,  
247 middle 344-1499, low<344 MPMs), subjects in the high mcfDNA tertile had worse 90-day survival by Kaplan-  
248 Meier curve analysis compared to subjects in other tertiles (global log-rank  $p=0.02$ ), whereas hcfDNA tertiles  
249 were not predictive of 90-day survival (Figure 4C-D). In contrast to the significant prognostic information of  
250 baseline total mcfDNA levels, there were no 90-day survival differences between the clinical classification SI  
251 groups (log-rank  $p=0.62$  for Micro-SI, Clinical-SI and No-Suspected-SI, data not shown). Stratified by 90-day  
252 survival, we found no significant differences in the longitudinal trajectories of total mcfDNA and hcfDNA levels  
253 between survivors and non-survivors (e-Figure 5A, B).

254

255 **Discussion:**

256 In this exploratory study, we systematically evaluated 42 COVID-19 inpatients with culture-independent  
257 mcfDNA-Seq. We found no significant differences in mcfDNA levels by SI clinical categories at baseline,

258 although culture-confirmed cases of SI (Micro-SI) had higher mcfDNA levels on follow-up samples. The  
259 mcfDNA species corresponded to clinically isolated pathogens in 81% of Micro-SI samples, and indicated  
260 potentially missed, super-infecting pathogens in up to 41% of subjects for whom there was no clinical suspicion  
261 for SI (No-Suspected-SI). Our molecular analyses revealed significant correlations of circulating mcfDNA levels  
262 with LRT bacterial burden, suggestive of plausible secondary pneumonias, as well as with plasma host-  
263 response biomarkers. Subjects with the highest tertile of mcfDNA burden had significantly lower 90-day  
264 survival independent of SI group. Longitudinal assessments revealed that mcfDNA levels can persist in SI  
265 without adequate source control such as the patient with parotitis or potentially with antibiotic resistant  
266 pathogens such as the patient with resistant *Pseudomonas* VAP. Our results were also notable for an  
267 unexpectedly high rate of failed mcfDNA-Seq runs due to high burden of circulating hcfDNA, which was much  
268 higher than historic cases of non-COVID-19 pneumonia, perhaps due to significant human tissue damage in  
269 severely ill patients with COVID-19, including patients supported by extra-corporeal membrane oxygenation.  
270 The higher likelihood of subsequent failed samples after initial failed samples suggests subject-specific  
271 influences on sequencing run outputs and results.

272 Our study highlights the challenge of clinically distinguishing cases with isolated SARS-CoV-2 infection  
273 from those complicated by SIs. The results of host-response biomarker analyses and mcfDNA-Seq did not  
274 match the clinical SI diagnoses and clinically-directed microbiologic work-up. For example, procalcitonin levels  
275 are often used as diagnostic biomarkers for bacterial infections, but have unclear diagnostic value for SIs in  
276 COVID-19.<sup>20,21</sup> We found similar procalcitonin levels among clinical SI groups, and importantly no significant  
277 association with mcfDNA levels. The clinical validity of mcfDNA sequencing was further supported by the  
278 significant correlations with LRT bacterial burden and systemic host-response biomarkers, as well as by the  
279 predictive value on 90-day survival. Our study suggests that noninvasive mcfDNA sequencing may offer  
280 insights into the presence of an SI and its impact on outcome.

281 Circulating mcfDNA was significantly associated with host immune response in COVID-19. McfDNA  
282 species may reflect SI-causal pathogens (regardless of their viability in the bloodstream), but may also signify  
283 lung barrier disruption in patients with acute lung injury from COVID-19, or even gut barrier disruption in  
284 patients with circulatory shock and hypoperfusion.<sup>14</sup> Thus, positive mcfDNA calls should not be directly  
285 interpreted as evidence of superinfecting pathogens, but interpreted within the context of a critical illness with

286 colonized mucosal surfaces by microbiota and impaired barrier function. The significant correlation between  
287 hcfDNA levels and RALE scores suggests that lung injury may account, at least in part, for the systemic levels  
288 of circulating hcfDNA. The significant correlations of mcfDNA with IL-6 and IL-8 levels highlighted the potential  
289 importance of mcfDNA in the inflammatory cascade of COVID-19, since mcfDNA can be recognized by Toll-  
290 like receptors and propagate systemic inflammatory responses, independent of the effects of SARS-CoV-2 on  
291 innate immunity.<sup>22</sup> Additionally, the case of Herpesvirus DNA identification highlighted the prevalence of viral  
292 re-activation in critical illness. Thus, any positive mcfDNA signal requires careful interpretation, as it may  
293 represent superinfecting bacterial or fungal VAP pathogens, translocating commensal microbes, sample  
294 collection skin/environmental contaminants or re-activated viral organisms.

295 Our study has several limitations. The sample size of 42 subjects limits the statistical power for some of  
296 the analyses, yet it is to our knowledge the largest study to utilize plasma metagenomics in patients with  
297 COVID-19, and we found significant associations with host inflammation and outcomes, consistent with our  
298 hypotheses. Clinical samples for microbiologic workup were collected at the discretion of the treating clinicians,  
299 and thus some of the mcfDNA-culture comparisons are limited. Nonetheless, our clinical dataset is  
300 representative of standard of care at a tertiary academic center. We systematically examined all patients for  
301 molecular evidence of possible SI using systematic evaluation with mcfDNA testing, regardless of clinician  
302 impressions. It is possible that for certain No-Suspected-SI subjects, the mcfDNA reported may not represent  
303 an active infection. Careful review of the mcfDNA-Seq output and integration with available evidence on  
304 organismal pathogenicity can help further inform interpretation of pathogen mcfDNA. Nonetheless, circulating  
305 mcfDNA carries prognostic information underlined by the significant associations with systemic inflammation  
306 and survival.<sup>11</sup> Our study was limited by an unexpected amount of failed mcfDNA-Seq analyses due to high  
307 amounts of interfering hcfDNA, but this finding provided important insight into the high degree of human  
308 cellular damage in COVID-19.

309 Our study advances understanding of the pathobiologic and diagnostic importance of circulating  
310 mcfDNA in COVID-19 and demonstrates limitations in clinical assessment of SIs. McfDNA correlated with  
311 biomarkers of host immune response and LRT microbial burden. Additional characterization of host  
312 inflammatory response components and triggers in COVID-19 is essential in the era of immunomodulatory  
313 therapeutics. The noninvasive modality of quantifying mcfDNA load and accurately identifying microbial

314 species may offer a sensitive tool for SI detection, as well as further advance our understanding of the role of  
315 translocating microbiota in critical illness. McfDNA sequencing may be particularly helpful in spontaneously  
316 breathing patients on high flow nasal cannula or non-invasive mechanical ventilation, for whom access to LRT  
317 specimens is challenging. Further prospective investigation for treatment guidance is necessary to  
318 systematically evaluate the incidence of molecular evidence for SI and examine the impact of non-invasive  
319 screening on patient outcomes.

320 References

- 321 1. Zhou F, Yu T, Du R, et al. Clinical course and risk factors for mortality of adult inpatients with COVID-19  
322 in Wuhan, China: a retrospective cohort study. *The Lancet*. 2020;395(10229):1054-1062.
- 323 2. Rouze A, Martin-Loeches I, Povoas P, et al. Relationship between SARS-CoV-2 infection and the  
324 incidence of ventilator-associated lower respiratory tract infections: a European multicenter cohort  
325 study. *Intensive Care Med*. 2021;47(2):188-198.
- 326 3. Maes M, Higginson E, Pereira-Dias J, et al. Ventilator-associated pneumonia in critically ill patients with  
327 COVID-19. *Crit Care*. 2021;25(1):25.
- 328 4. Pickens CO, Gao CA, Cuttica MJ, et al. Bacterial Superinfection Pneumonia in Patients Mechanically  
329 Ventilated for COVID-19 Pneumonia. *Am J Respir Crit Care Med*. 2021;204(8):921-932.
- 330 5. Kitsios GD, Morris A. Seek and Ye Shall Find: COVID-19 and Bacterial Superinfection. *Am J Respir Crit  
331 Care Med*. 2021;204(8):875-877.
- 332 6. Hughes S, Troise O, Donaldson H, Mughal N, Moore LSP. Bacterial and fungal coinfection among  
333 hospitalized patients with COVID-19: a retrospective cohort study in a UK secondary-care setting. *Clin  
334 Microbiol Infect*. 2020;26(10):1395-1399.
- 335 7. Investigators NC. Bronchoscopy on intubated patients with COVID-19 is associated with low infectious  
336 risk to operators. *Annals of the American Thoracic Society*. 2021;18(7):1243-1246.
- 337 8. Langford BJ, So M, Raybardhan S, et al. Antibiotic prescribing in patients with COVID-19: rapid review  
338 and meta-analysis. *Clin Microbiol Infect*. 2021;27(4):520-531.
- 339 9. Russell CD, Fairfield CJ, Drake TM, et al. Co-infections, secondary infections, and antimicrobial use in  
340 patients hospitalised with COVID-19 during the first pandemic wave from the ISARIC WHO CCP-UK  
341 study: a multicentre, prospective cohort study. *The Lancet Microbe*. 2021;2(8):e354-e365.
- 342 10. Blauwkamp TA, Thair S, Rosen MJ, et al. Analytical and clinical validation of a microbial cell-free DNA  
343 sequencing test for infectious disease. *Nat Microbiol*. 2019;4(4):663-674.
- 344 11. Kitsios GD, Bain W, Al-Yousif N, et al. Plasma microbial cell-free DNA load is associated with mortality in  
345 patients with COVID-19. *Respir Res*. 2021;22(1):24.
- 346 12. Drohan CM, Nouraie SM, Bain W, et al. Biomarker-Based Classification of Patients With Acute  
347 Respiratory Failure Into Inflammatory Subphenotypes: A Single-Center Exploratory Study. *Crit Care  
348 Explor*. 2021;3(8):e0518.
- 349 13. Bain W, Yang H, Shah FA, et al. COVID-19 versus Non-COVID-19 Acute Respiratory Distress Syndrome:  
350 Comparison of Demographics, Physiologic Parameters, Inflammatory Biomarkers, and Clinical  
351 Outcomes. *Ann Am Thorac Soc*. 2021;18(7):1202-1210.
- 352 14. Yang H, Haidar G, Al-Yousif NS, et al. Circulating microbial cell-free DNA is associated with  
353 inflammatory host-responses in severe pneumonia. *Thorax*. 2021;76(12):1231-1235.
- 354 15. Jacobs JL, Bain W, Naqvi A, et al. SARS-CoV-2 Viremia is Associated with COVID-19 Severity and Predicts  
355 Clinical Outcomes. *Clin Infect Dis*. 2021.
- 356 16. Jacobs J, Naqvi A, Shah F, et al. Plasma SARS-CoV-2 RNA levels as a biomarker of lower respiratory tract  
357 SARS-CoV-2 infection in critically ill patients with COVID-19. *Journal of Infectious Diseases*. 2022;In  
358 press.
- 359 17. Kotok D, Yang L, Evankovich JW, et al. The evolution of radiographic edema in ARDS and its association  
360 with clinical outcomes: A prospective cohort study in adult patients. *J Crit Care*. 2020;56:222-228.
- 361 18. Al-Yousif N, Komanduri S, Qurashi H, et al. Radiographic Lung Edema in Hospitalized Patients with  
362 COVID-19 Is Associated with Disease Severity and Clinical Outcomes. *B104. COVID ACROSS THE CARE  
363 CONTINUUM*: American Thoracic Society; 2022:A3554-A3554.
- 364 19. Meyer A, Buetti N, Houhou-Fidouh N, et al. HSV-1 reactivation is associated with an increased risk of  
365 mortality and pneumonia in critically ill COVID-19 patients. *Crit Care*. 2021;25(1):417.

- 366 20. Heer RS, Mandal AK, Kho J, et al. Elevated procalcitonin concentrations in severe Covid-19 may not  
367 reflect bacterial co-infection. *Ann Clin Biochem.* 2021;58(5):520-527.
- 368 21. Atallah NJ, Warren HM, Roberts MB, et al. Baseline procalcitonin as a predictor of bacterial infection  
369 and clinical outcomes in COVID-19: A case-control study. *PLoS One.* 2022;17(1):e0262342.
- 370 22. Savva A, Roger T. Targeting toll-like receptors: promising therapeutic strategies for the management of  
371 sepsis-associated pathology and infectious diseases. *Frontiers in immunology.* 2013;4:387.  
372

TABLE 1: Cohort characteristics by COVID-19 and SI category

| Variable                                                 | All patients                   | Micro-SI                        | Clinical-SI                      | No-Suspected-SI                 | P-value     |
|----------------------------------------------------------|--------------------------------|---------------------------------|----------------------------------|---------------------------------|-------------|
| <b>N</b>                                                 | 42                             | 8                               | 13                               | 21                              |             |
| <b>Male, n (%)</b>                                       | 26 (61.9)                      | 6 (75.0)                        | 8 (61.5)                         | 12 (57.1)                       | 0.68        |
| <b>Age (median [IQR])</b>                                | 65.1 [58.4, 76.5]              | 61.6 [56.4, 65.6]               | 73.5 [61.6, 76.7]                | 64.7 [58.1, 76.8]               | 0.26        |
| <b>BMI (median [IQR])</b>                                | 32.3 [26.5, 39.1]              | 32.3 [28.6, 41.1]               | 33.5 [30.8, 36.4]                | 30.1 [26.2, 38.9]               | 0.58        |
| <b>Diabetes, n (%)</b>                                   | 18 (42.9)                      | 5 (62.5)                        | 3 (25.0)                         | 10 (47.6)                       | 0.17        |
| <b>COPD, n (%)</b>                                       | 10 (23.8)                      | 2 (25.0)                        | 3 (25.0)                         | 5 (23.8)                        | 0.99        |
| <b>Immunosuppression, n (%)</b>                          | 4 (9.5)                        | 1 (12.5)                        | 0 (0.0)                          | 3 (14.3)                        | 0.37        |
| <b>Invasive Mechanical Ventilation, n (%)</b>            | 27 (64.3)                      | 7 ( 87.5)                       | 5 ( 38.5)                        | 15 ( 71.4)                      | <b>0.05</b> |
| <b>ECMO, n (%)</b>                                       | 8 (19.5)                       | 3 (37.5)                        | 1 (7.7)                          | 4 (19.0)                        | 0.24        |
| <b>WBC (median [IQR])</b>                                | 10.2 [6.7, 12.4]               | 13.3 [10.0, 14.2]               | 6.7 [5.9, 11.8]                  | 10.6 [7.4, 11.7]                | <b>0.04</b> |
| <b>WHO ordinal scale at ICU admission (median [IQR])</b> | 8.0 [7.2, 9.0]                 | 7.0 [5.0, 9.0]                  | 7.0 [6.0, 7.0]                   | 6.0 [5.0, 6.0]                  | 0.22        |
| <b>RALE score (median [IQR])</b>                         | 24.0 [21.1, 31.2]              | 21.8 [20.6, 23.1]               | 22.2 [21.0, 32.6]                | 26.2 [23.0, 35.8]               | 0.10        |
| <b>SARS-CoV-2 RNA in Plasma (cps/mL, median [IQR])</b>   | 867.0 [40.0, 5,742.5]          | 3.0 [3.0, 3.0]                  | 1,795.5 [86.5, 6,840.0]          | 2,491.0 [220.0, 5,445.0]        | <b>0.05</b> |
| <b>SARS-CoV-2 RNA in ETA (cps/mL, median [IQR])</b>      | 215,466.7 [2,718.8, 729,422.2] | 29.0 [29.0, 2,804.8]            | 338,240.0 [17,920.0, 508,444.4]  | 339,911.1 [33,351.1, 950,400.0] | 0.18        |
| <b>IL-6 pg/ml (median [IQR])</b>                         | 37.1 [15.7, 159.5]             | 128.0 [66.9, 188.4]             | 26.9 [14.7, 41.4]                | 36.0 [16.8, 165.7]              | 0.44        |
| <b>IL-8 pg/ml (median [IQR])</b>                         | 22.8 [14.7, 41.4]              | 29.1 [19.9, 52.4]               | 13.9 [7.1, 20.0]                 | 29.9 [17.6, 53.6]               | <b>0.05</b> |
| <b>ST2 pg/ml (median [IQR])</b>                          | 190532.0 [95113.3, 268265.7]   | 190,174.0 [89,313.7, 276,629.2] | 206,023.5 [151,105.8, 270,770.7] | 185961.2 [97840.6, 253415.2]    | 0.79        |
| <b>TNFR1 pg/ml (median [IQR])</b>                        | 4539.0 [3500.3, 8877.2]        | 7,622.3 [4,678.7, 11,256.5]     | 4,072.4 [3,179.9, 5,512.4]       | 4498.0 [3390.3, 9493.9]         | 0.28        |
| <b>SPD pg/ml (median [IQR])</b>                          | 25.1 [14.0, 57.6]              | 40.0 [21.9, 83.8]               | 39.0 [27.0, 55.1]                | 20.5 [8.3, 29.7]                | 0.26        |
| <b>RAGE pg/ml (median [IQR])</b>                         | 4576.8 [2422.6, 9071.2]        | 2,519.2 [1,566.5, 8,520.3]      | 2,689.6 [2,383.5, 8,455.6]       | 5879.8 [3856.5, 9982.9]         | 0.17        |
| <b>Ang-2 pg/ml (median [IQR])</b>                        | 4354.0 [2484.3, 7375.3]        | 9,805.2 [5,706.4, 15,904.0]     | 3,292.3 [2,098.3, 4,486.3]       | 3,195.6 [2,422.8, 5,096.5]      | <b>0.01</b> |



|                                                      |                          |                            |                             |                           |                 |
|------------------------------------------------------|--------------------------|----------------------------|-----------------------------|---------------------------|-----------------|
|                                                      |                          | 14,848.5]                  | 7,299.0]                    |                           |                 |
| <b>Procalcitonin pg/ml (median [IQR])</b>            | 461.0 [187.9, 1516.1]    | 403.8 [164.1, 798.8]       | 206.1 [147.6, 454.8]        | 815.1 [272.2, 1767.8]     | 0.08            |
| <b>Pentraxin-3 pg/ml (median [IQR])</b>              | 7826.2 [3584.4, 16080.0] | 6,908.7 [2,682.9, 8,793.6] | 6,827.5 [3,649.9, 11,186.3] | 13548.5 [3976.4, 20466.9] | 0.14            |
| <b>Human cfDNA MPM (median [IQR])</b>                | 563.5 [148.6, 1284.8]    | 750.6 [200.8, 1,299.4]     | 325.9 [109.1, 563.7]        | 686.2 [148.7, 2253.5]     | 0.17            |
| <b>Total microbial cfDNA MPM (median [IQR])</b>      | 812.9 [151.3, 2435.5]    | 1,614.9 [794.8, 1,7812.8]  | 1.0 [1.0, 818.1]            | 1026.6 [457.7, 2464.9]    | 0.17            |
| <b>Bacterial cfDNA MPM (median [IQR])</b>            | 600.4 [1.0, 2906.1]      | 9,349.2 [559.7, 28,503.5]  | 1.0 [1.0, 86.0]             | 822.9 [117.9, 1956.0]     | 0.07            |
| <b>Fungal cfDNA MPM (median [IQR])</b>               | 1.0 [1.0, 1.0]           | 158.8 [1.0, 388.7]         | 1.0 [1.0, 1.0]              | 1.0 [1.0, 1.0]            | <b>&lt;0.01</b> |
| <b>Respiratory pathogen cfDNA MPM (median [IQR])</b> | 1.0 [1.0, 1,480.8]       | 9,349.2 [559.7, 28,503.5]  | 1.0 [1.0, 13.5]             | 118.0 [1.0, 1480.8]       | 0.06            |

374 \*COVID-19 diagnosis made by positive nasopharyngeal (NP) qPCR test for SARS-CoV-2 in 42/43 subjects, and for one subject with negative NP  
375 qPCR test by positive anti-spike protein antibodies (patient enrolled in April 2020, prior to initiation of vaccination programs). P-values significant  
376 below threshold of 0.05 are shown in bold. Abbreviations: Microbiologically-Diagnosed Secondary Infection (Micro-SI); Clinically-Diagnosed  
377 Secondary Infections (Clinical-SI); No Clinical Suspicion for SI (No-Suspected-SI); chronic obstructive pulmonary disease (COPD); extracorporeal  
378 membrane oxygenation (ECMO); Radiographic Assessment of Lung Edema score (RALE score); receptor for advanced glycation end products  
379 (RAGE); suppression of tumorigenicity (ST-2); tumour necrosis factor receptor (TNFR-1); Surfactant Protein D (SPD); molecules per microliter  
380 (MPMs).

381

382 Figure 1:

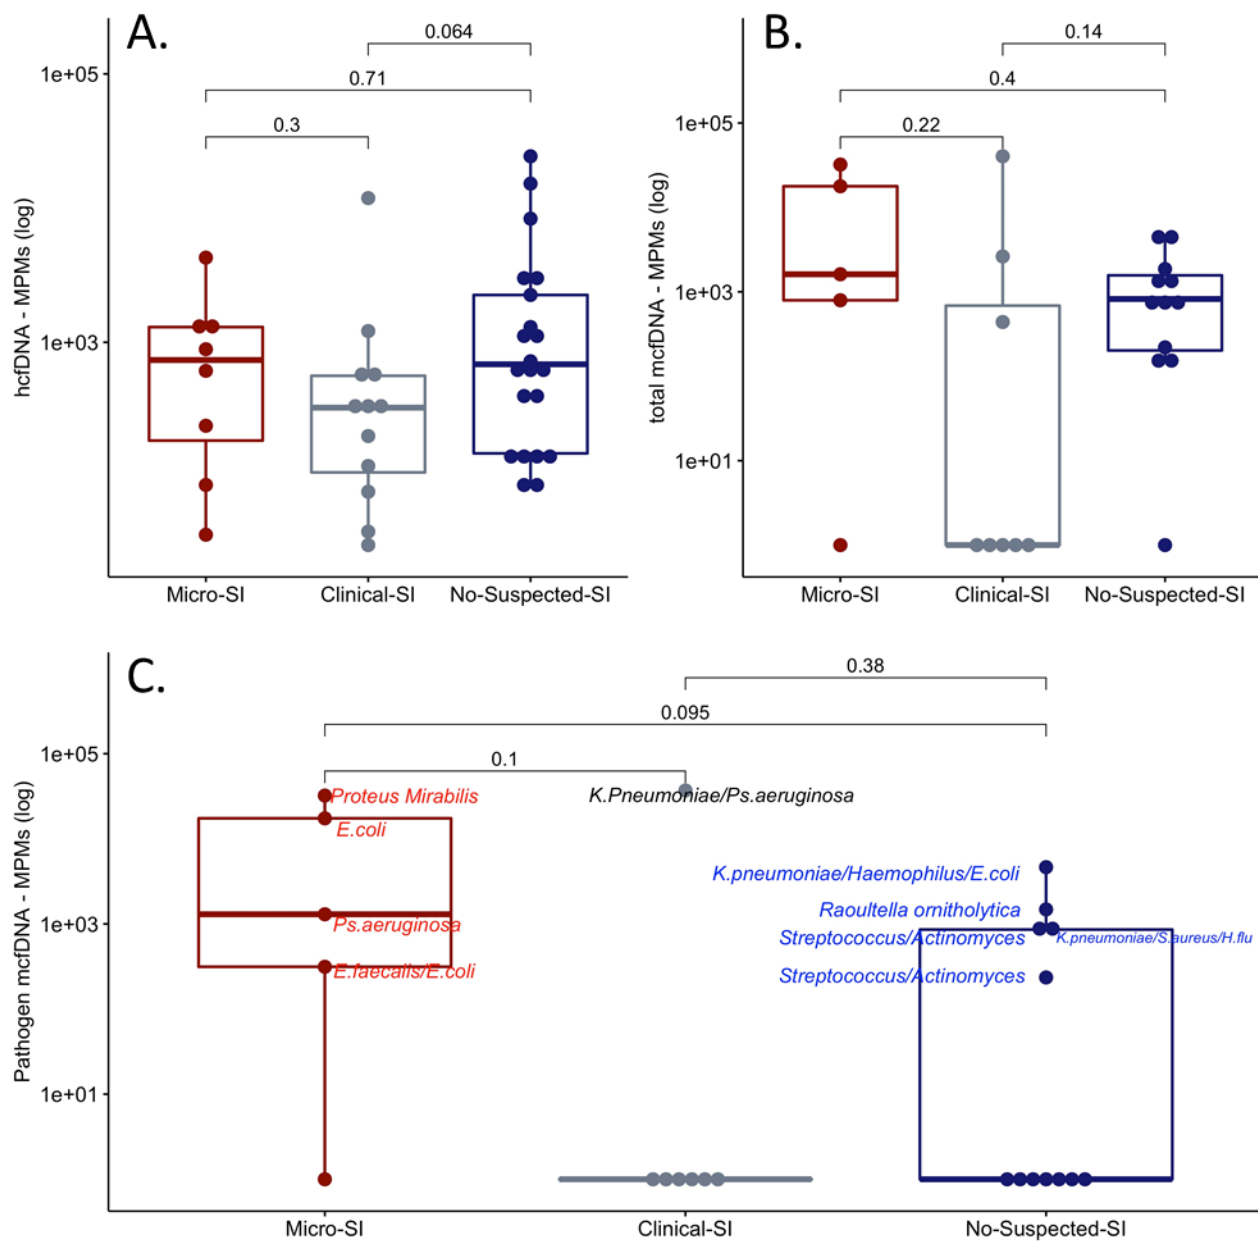

383

384

385

386

387

388

389

390

Figure 1: Clinical classification of secondary infection diagnosis among patients with COVID-19 did not show significant differences in human (A) or microbial cell-free DNA levels (B-C). Subjects classified as Microbiologically-Confirmed Secondary Infection (Micro-SI) had numerically higher but statistically non-significant different levels of total and pathogen microbial cell-free DNA (mcfDNA) compared to subjects classified as Clinically-Diagnosed Secondary Infections (Clinical-SI) or those with no Clinical Suspicion for SI (No-Suspected-SI). Pairwise comparisons were conducted with Wilcoxon test. In panel C, the most abundant microbial species in each of the positive samples for pathogen mcfDNA are shown.

391 Figure 2:

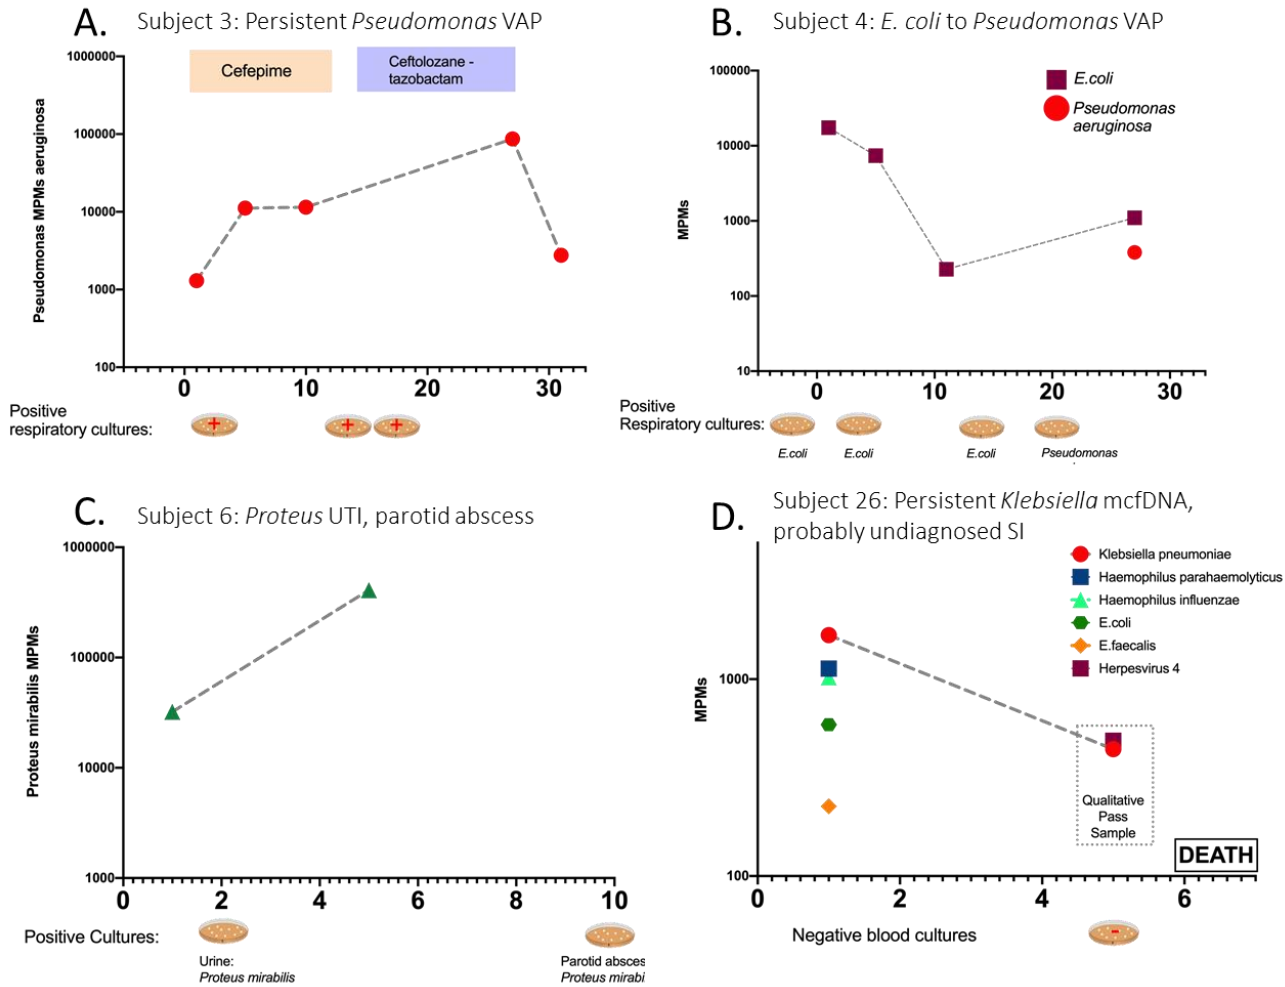

392

393

394

395

396

397

398

399

400

401

402

403

404

405

406

407

408

409

Figure 2: Comparison of plasma mcfDNA sequencing with microbiologic/clinical diagnoses across the timeline of four subjects with serial sampling. Species-specific microbial MPMS (y-axis) are shown across sequential sampling days from enrollment, (x-axis). Petri dish graphics along the x-axis denote the timing and results of clinically obtained microbiological testing. Subject 3 (A) was an immunocompetent patient with a persistent culture-confirmed *Pseudomonas* VAP that persisted through the antimicrobials, with timing and therapy noted above. Subject 3 had persistently elevated *Pseudomonas* mcfDNA levels throughout the extended infection course, which ultimately correlated with clinical improvement (A). Subject 4 (B) had sequential VAPs with changing pathogens detected on invasive respiratory cultures, *E. coli* followed by *Pseudomonas*, which was concordantly reported on noninvasive mcfDNA sampling. Subject 6 (C) was a patient with diabetes who was initially found to have a resistant *Proteus* urinary infection, and a subsequent persistent septic clinical picture, later found to have a polymicrobial, including *Proteus*, parotid gland abscess. *Proteus* mcfDNA levels remained elevated in Subject 6 during initial antimicrobial therapy for urinary infection, suggesting the persistent source of infection. Subject 26 (D) was clinically determined No-Suspicion-for-SI, but had a deteriorating clinical course, without cultures obtained for 5 days or empiric antimicrobials, and ultimately died of shock and multisystem organ failure. Noninvasive testing revealed persistent levels of *Klebsiella pneumoniae* mcfDNA levels, which suggests an undiagnosed SI may have contributed to the clinical course.

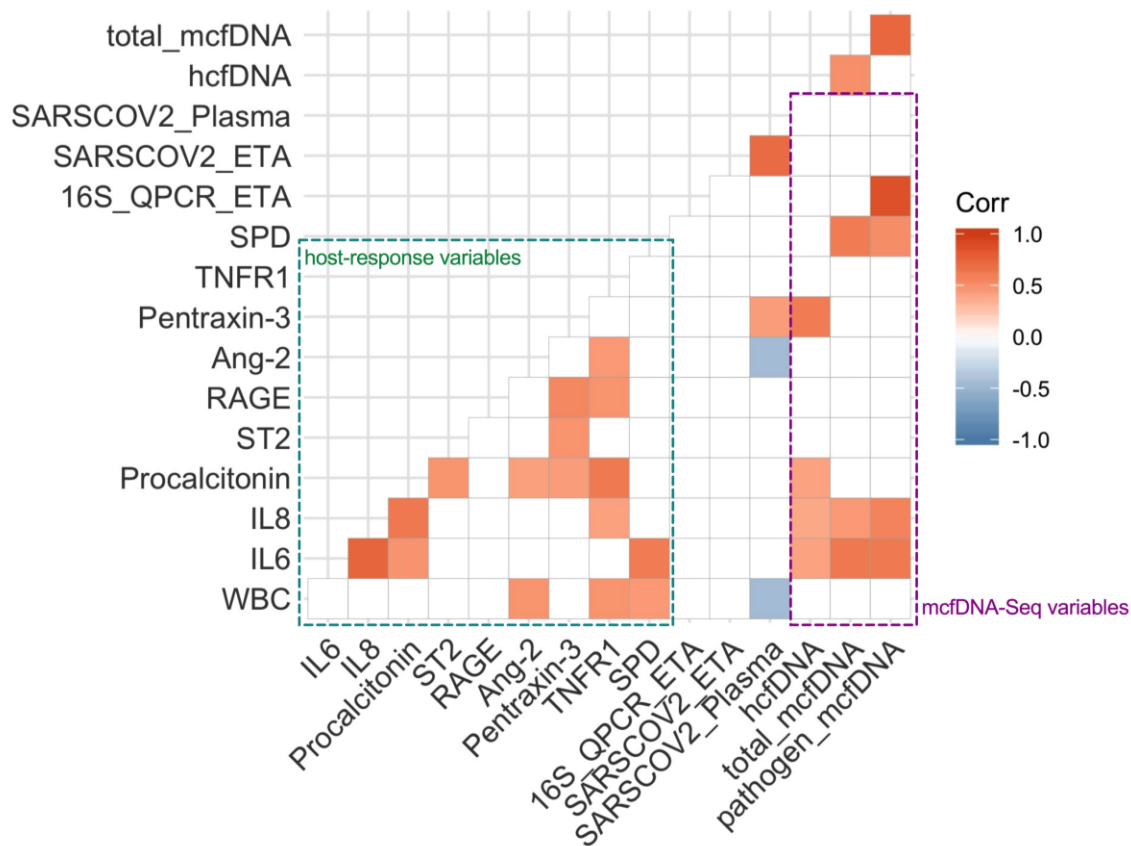

410

411

412

413

414

415

416

417

418

419

Figure 3: Plasma microbial cell-free DNA levels were significantly correlated with lower respiratory tract bacterial load and plasma host response biomarkers. Correlogram demonstrating comparisons of host nine response biomarkers (green dashed box), number of 16S rRNA gene copies by qPCR in Endotracheal Aspirates (ETA, surrogate for lower respiratory tract bacterial load), number of SARS-COV-2 RNA copies in ETA and plasma samples by qPCR, and mcfDNA-Seq output (hcfDNA, total mcfDNA and pathogen mcfDNA – purple dashed box). Significant correlations with the Pearson’s method and following adjustment for multiple comparisons by the Benjamini-Hochberg method are shown, with direction and strength of correlation depicted by the color scale on the right panel.

420 Figure 4:

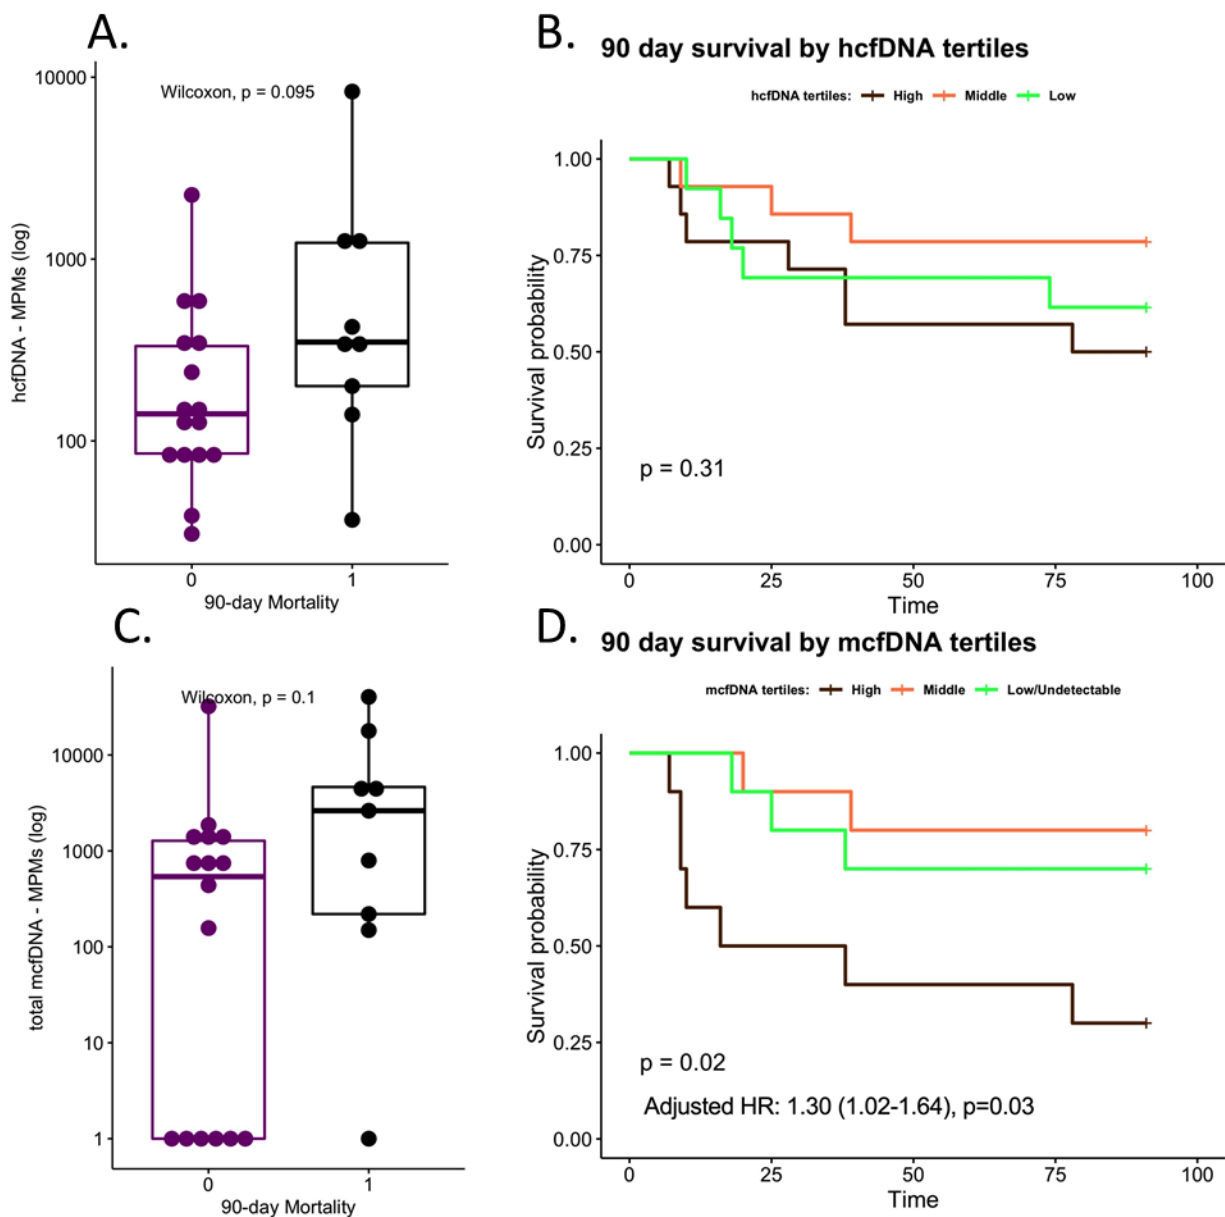

421

422

423

424

425

426

427

428

429

Figure 4: Highest microbial cell-free DNA levels at baseline were significantly associated with worse 90-day survival. 90-day non-survivors had numerically higher (but statistically non-significant) plasma hcfDNA (A) and mcfDNA (C) levels. HcfDNA levels were not significantly associated with 90-day survival by Kaplan-Meier analysis (B). Patients with the highest tertile of mcfDNA (>1499 Molecules per Microliter) had significantly worse survival compared to patients in the other two mcfDNA tertiles (D). In a Cox proportional hazards model adjusted for age, mcfDNA levels were significantly associated with increased hazards of death (D, adjusted hazard ratio for  $\log_{10}$ -transformed mcfDNA 1.30, 95% confidence interval 1.02-1.64,  $p=0.03$ ).

430  
431

## SUPPLEMENT:

e-Table 1: Baseline characteristics by sequencing run success.

| Variable                                          | Pass                         | Pass Qualitatively            | Fail                          | P-value         |
|---------------------------------------------------|------------------------------|-------------------------------|-------------------------------|-----------------|
| N                                                 | 25                           | 5                             | 12                            |                 |
| Male, n (%)                                       | 20 (64.5)                    | 1 (20.0)                      | 8 (61.5)                      | 0.12            |
| Age (median [IQR])                                | 68.7 [60.2, 76.8]            | 78.4 [63.1, 86.8]             | 58.5 [57.2, 64.7]             | <b>0.04</b>     |
| BMI (median [IQR])                                | 31.6 [26.4, 34.0]            | 30.1 [26.8, 36.4]             | 39.6 [28.7, 42.4]             | 0.35            |
| Diabetes, n (%)                                   | 11 ( 44.0)                   | 3 ( 60.0)                     | 4 ( 33.3)                     | 0.59            |
| COPD, n (%)                                       | 9 ( 36.0)                    | 1 ( 20.0)                     | 0 ( 0.0)                      | <b>0.05</b>     |
| Immunosuppression, n (%)                          | 2 ( 8.0)                     | 1 ( 20.0)                     | 1 ( 8.3)                      | 0.7             |
| Invasive Mechanical Ventilation, n (%)            | 14 ( 56.0)                   | 4 ( 80.0)                     | 9 ( 75.0)                     | 0.39            |
| ECMO, n (%)                                       | 3 ( 12.0)                    | 1 ( 20.0)                     | 4 ( 33.3)                     | 0.3             |
| WBC (median [IQR])                                | 9.4 [6.3, 11.8]              | 11.1 [11.1, 11.5]             | 10.2 [7.4, 13.7]              | 0.46            |
| WHO ordinal scale at ICU admission (median [IQR]) | 5.0 [5.0, 6.0]               | 5.5 [5.0, 6.5]                | 7.0 [6.0, 8.5]                | <b>0.01</b>     |
| RALE score (median [IQR])                         | 22.5 [21.0, 28.0]            | 23.0 [22.8, 24.0]             | 27.5 [20.6, 35.8]             | 0.56            |
| SARS-CoV-2 RNA in Plasma (cps/mL, median [IQR])   | 196.5 [3.0, 3349.0]          | 6352.0 [3286.0, 26029.3]      | 2491.0 [335.0, 6874.5]        | 0.3             |
| IL6 pg/ml (median [IQR])                          | 33.9 [16.9, 124.9]           | 165.7 [89.7, 1109.9]          | 51.1 [15.7, 221.3]            | 0.19            |
| IL8 pg/ml (median [IQR])                          | 22.2 [13.9, 33.6]            | 35.9 [29.9, 181.2]            | 17.6 [15.1, 62.3]             | 0.29            |
| ST2 pg/ml (median [IQR])                          | 142138.6 [78170.4, 198277.7] | 253415.2 [218252.9, 578677.0] | 287500.3 [216718.3, 328329.0] | <b>&lt;0.01</b> |
| TNFR1 pg/ml (median [IQR])                        | 4186.0 [3555.3, 7971.9]      | 9493.9 [6465.9, 12598.6]      | 4919.9 [3417.1, 6956.2]       | 0.44            |
| SPD pg/ml (median [IQR])                          | 24.3 [10.0, 43.0]            | 80.5 [20.8, 141.9]            | 26.0 [13.2, 53.1]             | 0.46            |
| RAGE pg/ml (median [IQR])                         | 4245.9 [2419.5, 9023.2]      | 4518.6 [2410.7, 9982.9]       | 5518.4 [2884.1, 7936.1]       | 0.97            |
| Ang-2 pg/ml (median [IQR])                        | 3905.8 [1935.6, 7130.4]      | 4505.1 [3942.7, 8903.3]       | 4543.4 [2886.8, 10443.9]      | 0.5             |
| Procalcitonin pg/ml (median [IQR])                | 280.0 [167.0, 558.5]         | 3630.8 [1767.8, 4556.7]       | 580.8 [240.5, 1478.0]         | <b>0.01</b>     |
| Pentraxin-3 pg/ml (median [IQR])                  | 6085.9 [2937.8, 13127.0]     | 19508.6 [6766.4, 32196.3]     | 12979.7 [7122.9, 18778.3]     | 0.1             |
| Human cfDNA MPM (median [IQR])                    | 200.3 [91.3, 424.2]          | 722.2 [686.2, 1299.7]         | 1343.1 [949.5, 3731.9]        | <b>&lt;0.01</b> |

|                                                      |                     |                         |                            |      |
|------------------------------------------------------|---------------------|-------------------------|----------------------------|------|
| <b>Total microbial cfDNA MPM (median [IQR])</b>      | 794.8 [1.0, 1863.1] | 1480.8 [818.1, 21805.9] | NA                         | 0.14 |
| <b>Bacterial cfDNA MPM (median [IQR])</b>            | 252.3 [1.0, 1343.9] | 1480.8 [537.1, 21805.9] | 42735.5 [42735.5, 42735.5] | 0.13 |
| <b>Fungal cfDNA MPM (median [IQR])</b>               | 1.0 [1.0, 1.0]      | 1.0 [1.0, 1.0]          | 1.0 [1.0, 1.0]             | 0.67 |
| <b>Respiratory pathogen cfDNA MPM (median [IQR])</b> | 1.0 [1.0, 1015.8]   | 1480.8 [1.0, 21805.9]   | 42735.5 [42735.5, 42735.5] | 0.12 |

432 P-values significant below threshold of 0.05 are shown in bold. Abbreviations: Microbiologically-Diagnosed Secondary Infection (Micro-SI);  
433 Clinically-Diagnosed secondary infections (Clinical-SI); No Clinical Suspicion for SI (No-Suspected-SI); chronic obstructive pulmonary disease  
434 (COPD); extracorporeal membrane oxygenation (ECMO); Radiographic Assessment of Lung Edema score (RALE score); receptor for advanced  
435 glycation end products (RAGE); suppression of tumorigenicity (ST-2); tumour necrosis factor receptor (TNFR-1); Surfactant Protein D (SPD);  
436 molecules per microliter (MPMs).

437 e-Figure 1:

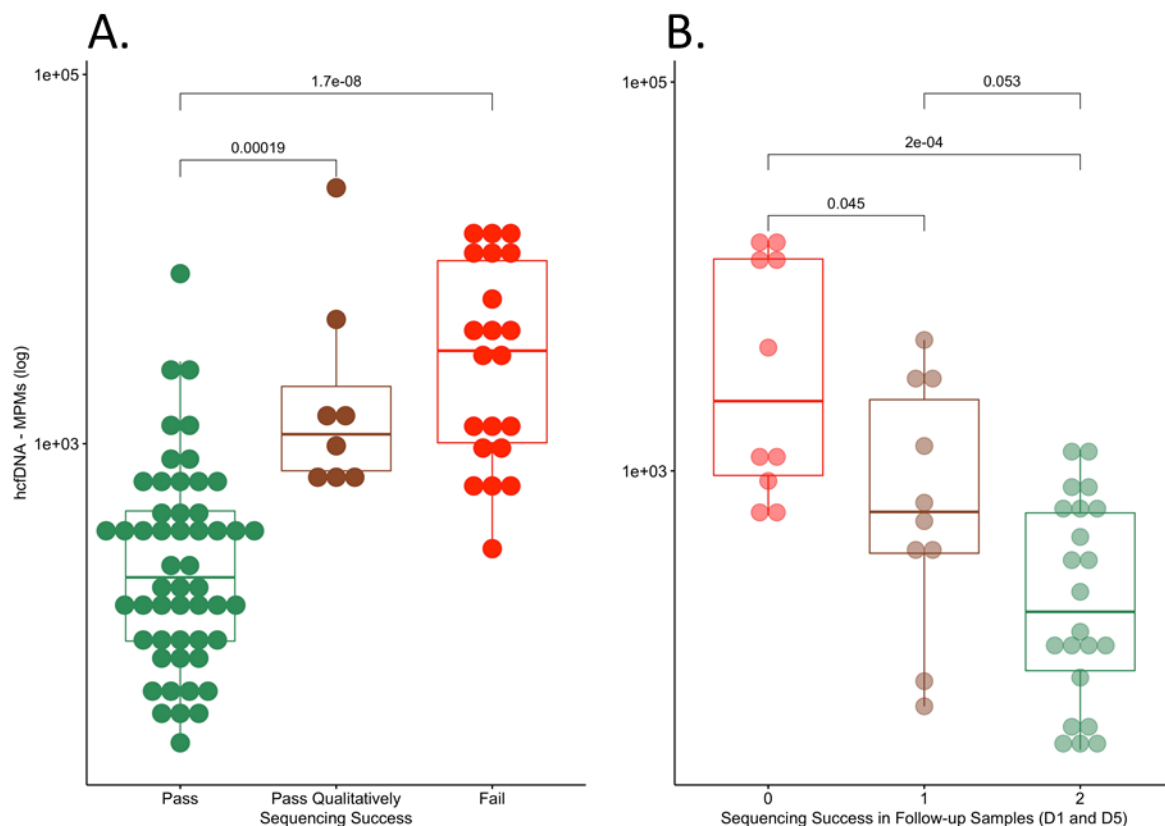

438

439 e-Figure 1: Successful plasma metagenomic sequencing runs had significantly lower levels of human cell-free  
440 DNA compared to unsuccessful runs. We classified the derived metagenomic sequences as human (hcfDNA)  
441 vs. microbial (mcfDNA), expressed as molecules per microliter (MPMs). Based on meeting minimum  
442 sequencing coverage metric required for quality control, we classified sequencing runs as successful (“Pass”),  
443 “Qualitatively Pass” or “Failed”. Baseline “Pass” samples had significantly lower hcfDNA compared to  
444 “Qualitatively Pass” or “Failed” samples (Wilcoxon test pairs  $p < 0.001$ , panel A). We also found that among  
445 subjects with both Day 1 and Day 5 samples, those samples that failed on both time points per subject (i.e. “0”  
446 sequencing success in panel B) had significantly higher hcfDNA levels compared to “Pass” samples on both  
447 days (Wilcoxon  $p$ -value  $< 0.001$ ).

448

449

450

451



452 e-Figure 2:

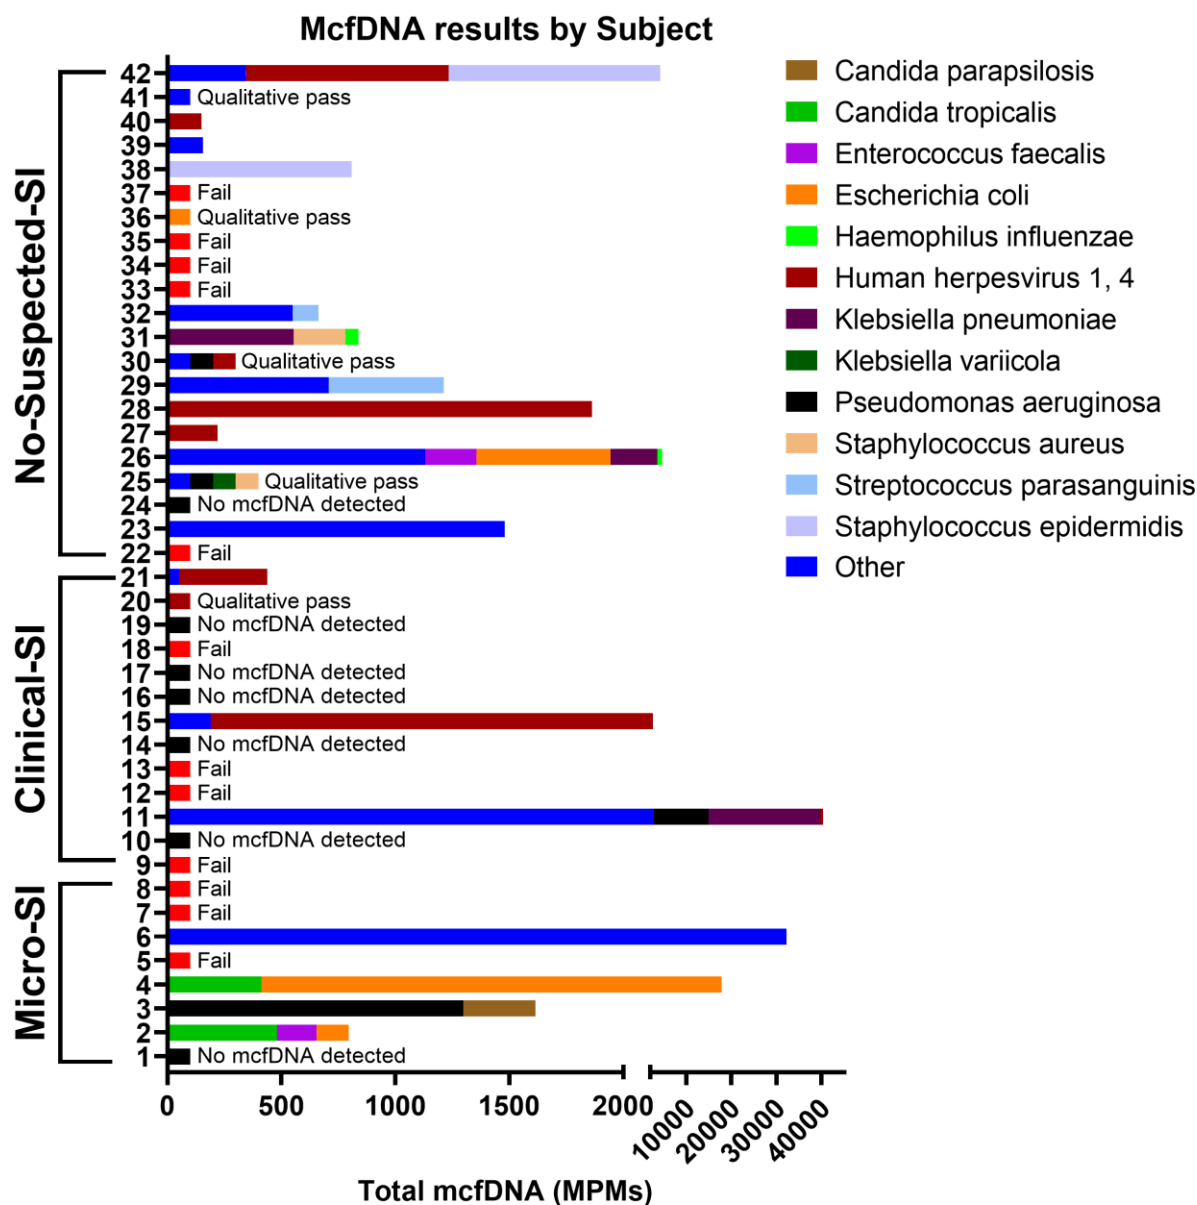

453

454

455

456

457

458

459

460

e-Figure 2: Significantly higher proportion of positive samples with mcfDNA species calls in No-Suspected-SI compared to Clinical-SI samples. We display samples grouped by SI classification and sample identifier, showing the species and respective MPMs called by mcfDNA-Seq. Standardized bars indicate failed samples, samples with no species called, and those with qualitative pass, yielding species each denoted with standardized bar. Infrequently called species were combined for visual simplicity.

e-Figure 3:

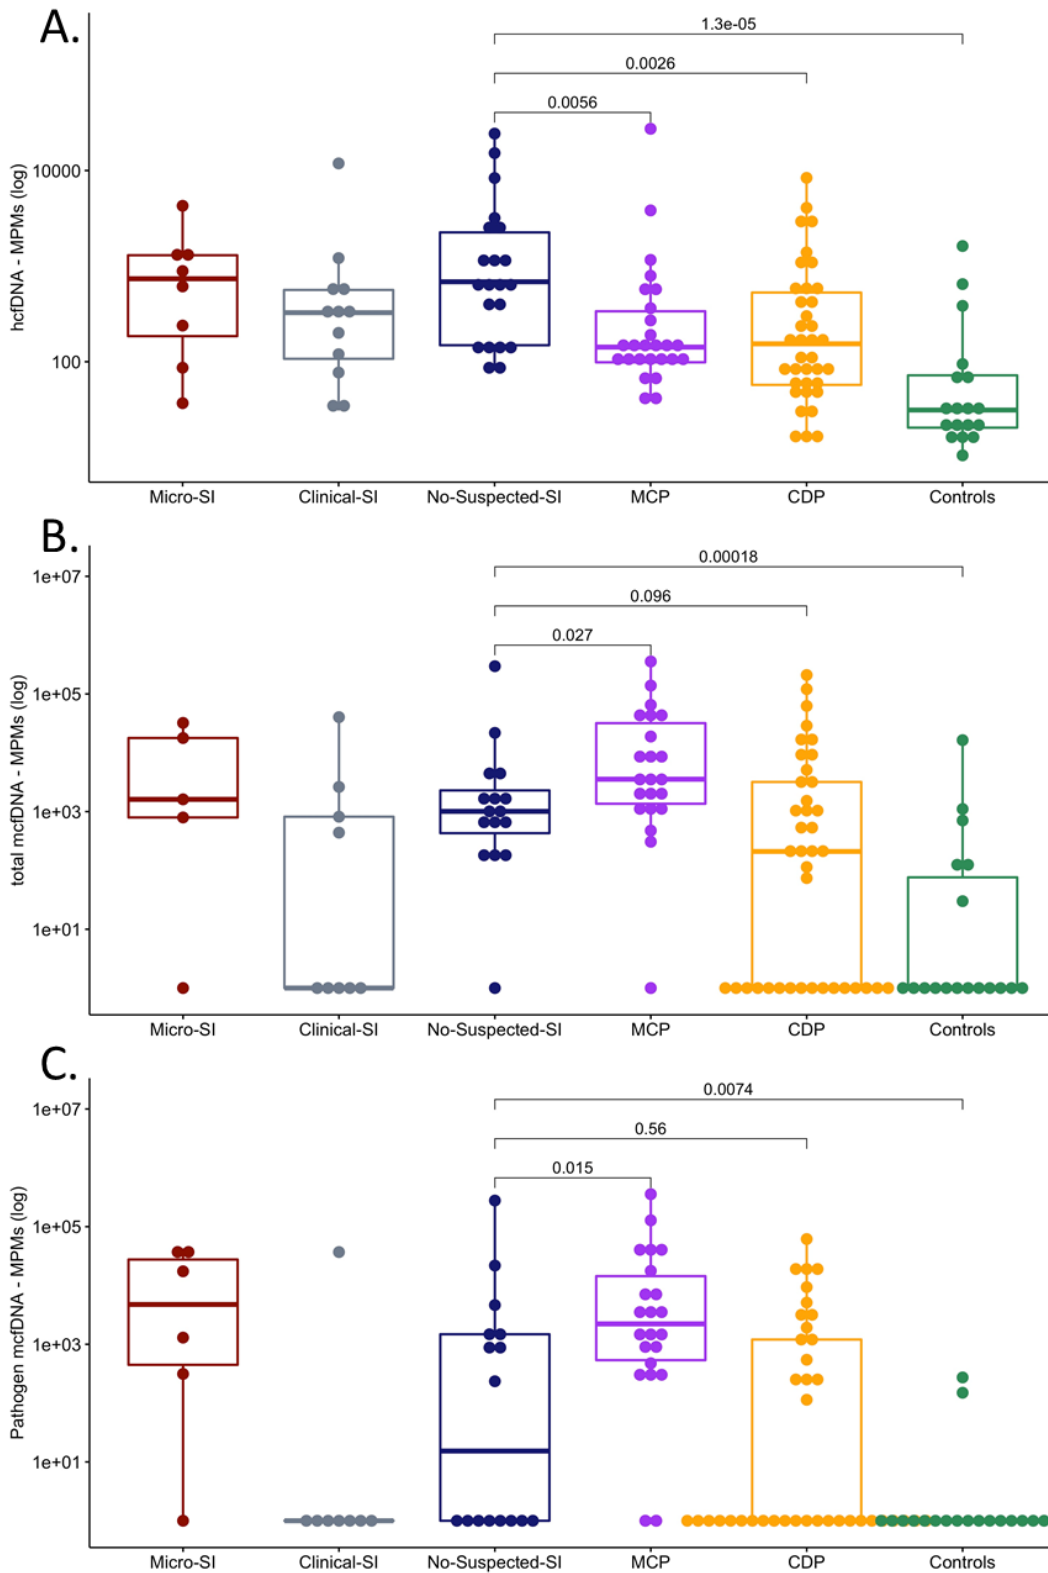

461

462

463

464

e-Figure 3: Subjects with COVID-19 have much higher levels of human cell-free DNA compared to non-COVID subjects with and without pneumonia. To contextualize the circulating cfDNA load in our COVID-19 cohort, we compared hcfDNA, total mcfDNA and pathogen mcfDNA MPMs between the COVID-19 SI categories against

465 available published data from our group for mechanically ventilated patients with microbiologically-confirmed  
466 pneumonia (n=26, MCP), clinically-diagnosed pneumonia (n=41, CDP) and uninfected controls (n=16,  
467 intubated for airway protection or due to cardiogenic pulmonary edema). We found markedly higher levels of  
468 hcfDNA in subjects with COVID-19 compared to all non-COVID patient groups (p-values shown for the No-  
469 Suspected-SI only for parsimony). Non-COVID patients with microbiologically-confirmed pneumonia had higher  
470 mcfDNA levels compared to patients with COVID-19 with No-Suspected-SI, who in turn had markedly higher  
471 mcfDNA levels compared to uninfected controls.

472

473

474 e-Figure 4:

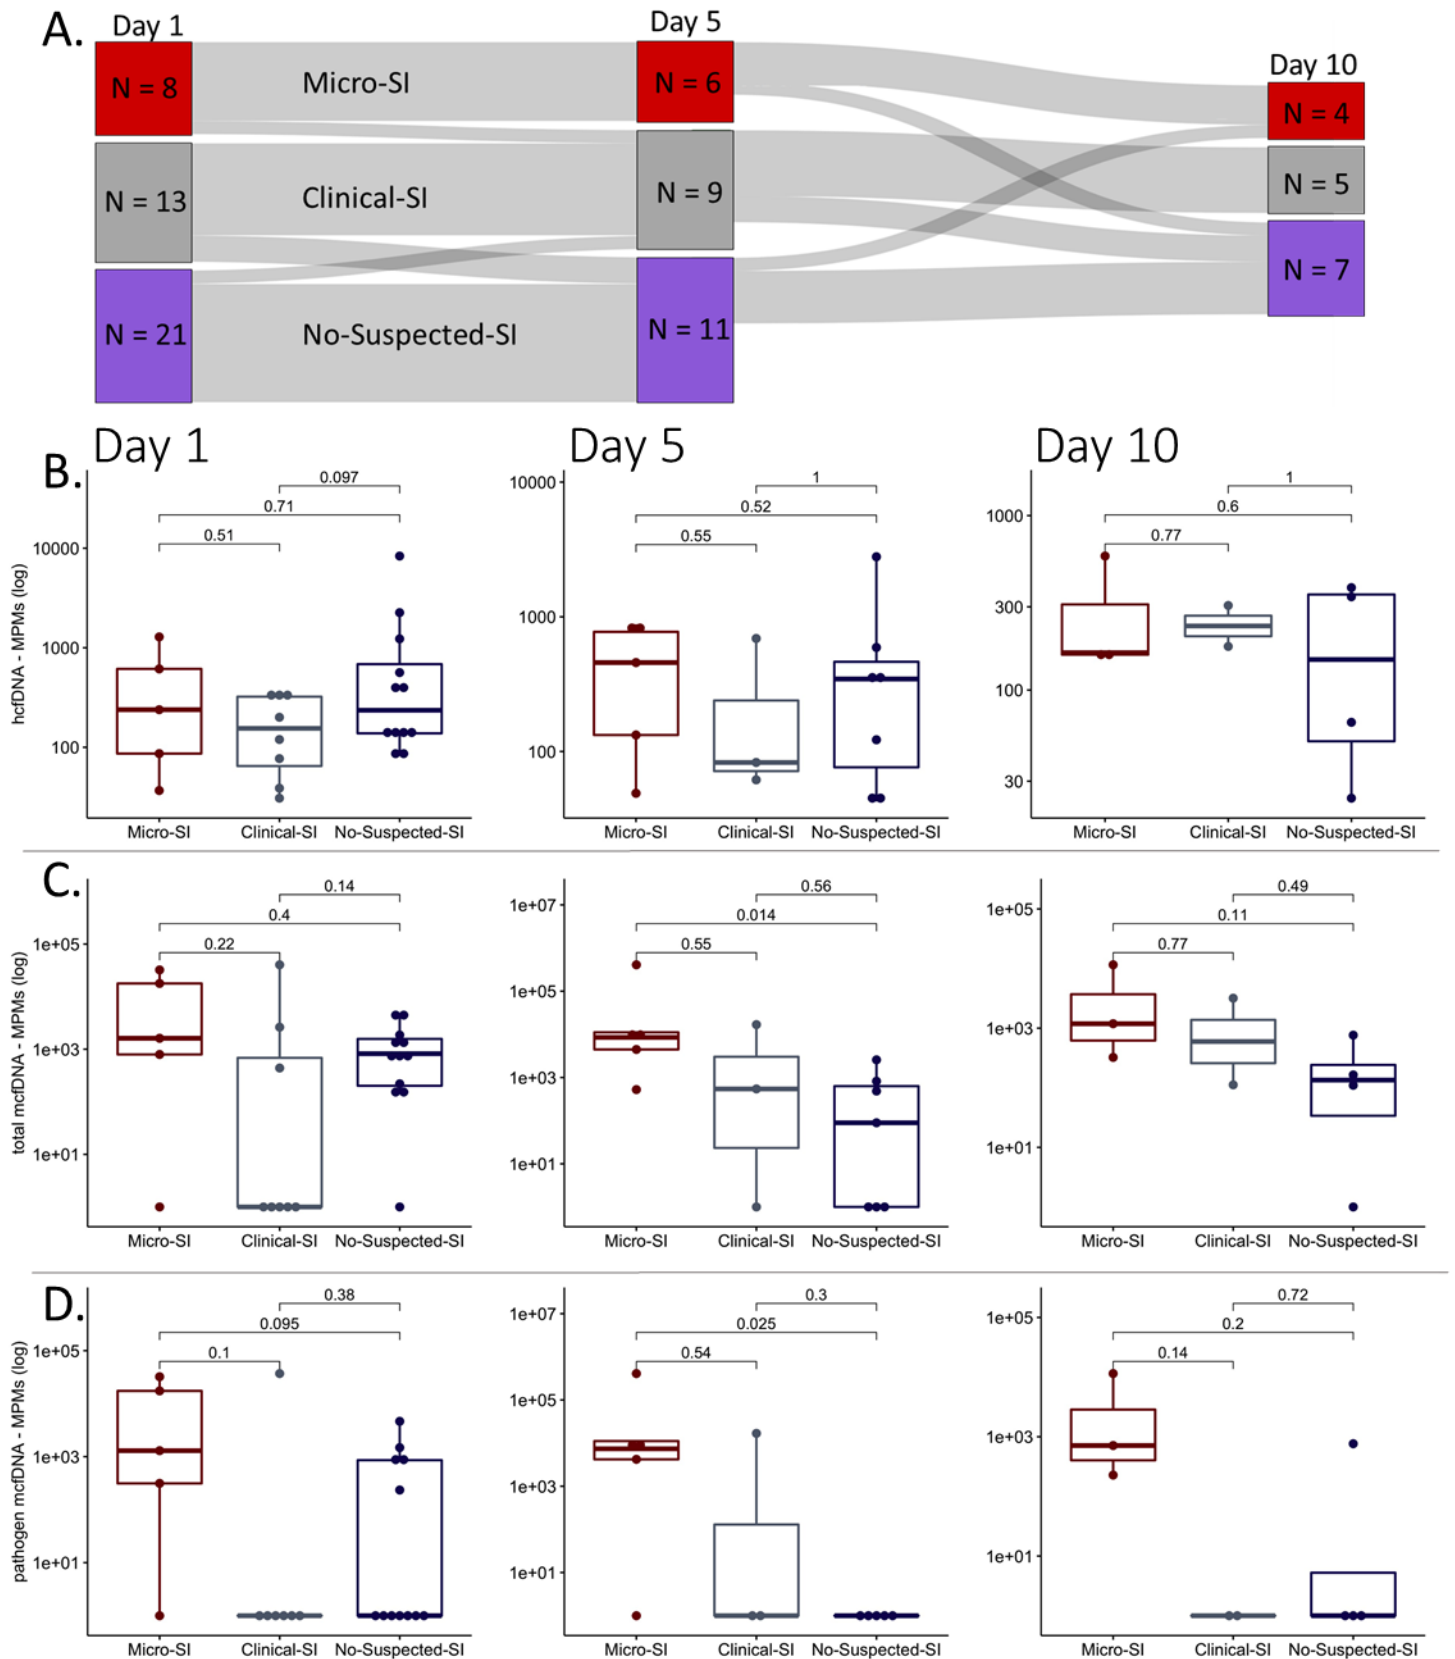

475  
476

e-Figure 4: Longitudinal subject, mcfDNA and human cfDNA changes across SI classification. This Sankey plot shows the subjects who transitioned between SI categories throughout the study from days 1, to 5, and 10 (A).

477

478 Height of bars represents number of subjects. Attrition occurred throughout the study leading to decreased  
479 height of day 5 and 10 nodes. HcfDNA was not significantly different among SI groups across the study period  
480 (B). Total mcfDNA was not significantly different among SI categories on enrollment (C). Micro-SI subjects had  
481 significantly higher total and pathogen mcfDNA versus No-Suspected-SI subjects at Day 5 (C, D).  
482  
483

e-Figure 5:

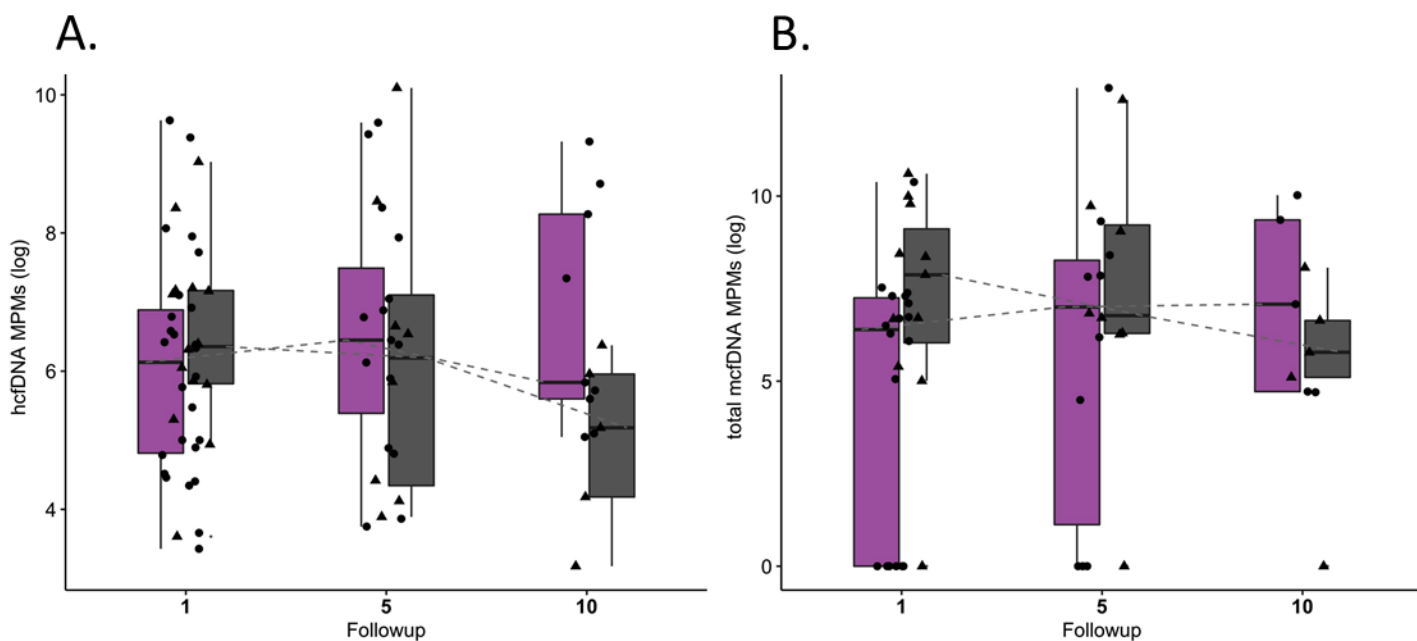

484  
485 e-Figure 5: Human and total mcfDNA trajectories among survivors and non-survivors. Trajectories of human  
486 cfDNA and total mcfDNA were not significantly different across the study period in survivors and non-survivors  
487 (A, B).  
488  
489  
490  
491

492 e-Table 2: Subject cfDNA and culture results

| ID | Day | SI group        | cfDNA sequencing run | hcfDNA MPMs | McfDNA (Organism, MPMs)                                                                                | Clinical microbiology results [Sample Type (Time from research sample): Results]                                                                                                                      | Synthesis of mcfDNA with clinical microbiology                |
|----|-----|-----------------|----------------------|-------------|--------------------------------------------------------------------------------------------------------|-------------------------------------------------------------------------------------------------------------------------------------------------------------------------------------------------------|---------------------------------------------------------------|
| 1  | 1   | Micro-SI        | Pass                 | 238.8       | No Organism Reported, 0                                                                                | - <u>Blood</u> (Day -3): NG<br>- <u>BAL</u> (Day -3): GS: Many WBCs; Moderate GNRs; Cx: Rare <i>Escherichia coli</i> , Light NRF                                                                      | - Discordant                                                  |
|    | 5   | Micro-SI        | Pass                 | 457.4       | <i>Escherichia coli</i> , 4208<br><i>Bacteroides vulgatus</i> , 255                                    |                                                                                                                                                                                                       | - Concordant<br>- Microbe of unclear clinical significance    |
| 2  | 1   | Micro-SI        | Pass                 | 36.8        | <i>Candida tropicalis</i> , 481<br><i>Enterococcus faecalis</i> , 174<br><i>Escherichia coli</i> , 140 | - <u>BAL</u> (Day -2): GS: Many WBCs, Few GPC; Cx: Light MSSA, NRF, Yeast                                                                                                                             | - Discordant                                                  |
|    | 5   | Micro-SI        | Pass                 | 49.0        | <i>Human herpesvirus 1</i> , 449<br><i>Candida tropicalis</i> , 75                                     | - <u>CSF</u> (Day -1): Cx: NG, PCR: HSV ND; Ag: Cryptococcal ND                                                                                                                                       | - Discordant<br>- Microbe of unclear clinical significance    |
|    | 10  | No-Suspected-SI | Pass                 | 24.0        | No Organism Reported, 0                                                                                | - <u>Blood</u> (Day -2): NG                                                                                                                                                                           | - Concordant                                                  |
| 3  | 1   | Micro-SI        | Pass                 | 86.5        | <i>Pseudomonas aeruginosa</i> , 1298<br><i>Candida parapsilosis</i> , 317                              | - <u>Sputum</u> (Day -2): GS: Few WBCs, Moderate GNR; Cx: Moderate <i>Pseudomonas aeruginosa</i> , Rare NRF                                                                                           | - Concordant                                                  |
|    | 5   | Micro-SI        | Pass                 | 132.5       | <i>Pseudomonas aeruginosa</i> , 11148                                                                  |                                                                                                                                                                                                       | - Concordant                                                  |
|    | 10  | Micro-SI        | Pass                 | 155.6       | <i>Pseudomonas aeruginosa</i> , 11455<br><i>Candida parapsilosis</i> , 121                             | - <u>Sputum</u> (Day -2): GS: Moderate WBCs, Few GNR; Cx: Heavy <i>Pseudomonas aeruginosa</i> , Rare NRF<br>- <u>Urine</u> (Day 0): Cx: NG                                                            | - Concordant,<br>- Microbe of unclear clinical significance   |
|    | 27  | Micro-SI        | Pass                 | 332.6       | <i>Pseudomonas aeruginosa</i> , 86832                                                                  |                                                                                                                                                                                                       | - Culture not available<br>-- concordant with prior infection |
|    | 31  | Micro-SI        | Pass                 | 47.7        | <i>Pseudomonas aeruginosa</i> , 2763                                                                   | - <u>Sputum</u> (Day -1): GS: Many WBCs, Few GNR<br>Cx: Moderate <i>Pseudomonas aeruginosa</i> , Light NRF<br>- <u>Urine</u> (Day -1): Cx: NG<br>- <u>Stool</u> (Day +1): PCR: <i>C. difficile</i> ND | - Concordant                                                  |

|   |    |          |      |        |                                                                                                                                                      |                                                                                                                                                                                                                          |                                                                                                             |
|---|----|----------|------|--------|------------------------------------------------------------------------------------------------------------------------------------------------------|--------------------------------------------------------------------------------------------------------------------------------------------------------------------------------------------------------------------------|-------------------------------------------------------------------------------------------------------------|
| 4 | 1  | Micro-SI | Pass | 1284.8 | <i>Escherichia coli</i> , 17400<br><i>Candida tropicalis</i> , 413                                                                                   | - Blood (Day -2):<br><i>Staphylococcus epidermidis</i><br>- BAL (Day -1): GS:<br>Many WBCs, Rare GPCP<br>Cx: <i>Staphylococcus aureus</i> (>100,000 cfu/mL), <i>Escherichia coli</i> (600 cfu/mL)<br>- Blood (Day 0): NG | - Concordant,<br>- Microbe of unclear clinical significance                                                 |
|   | 5  | Micro-SI | Pass | 773.2  | <i>Escherichia coli</i> , 7388<br><i>Candida tropicalis</i> , 841<br><i>Prevotella bivia</i> , 278                                                   | - Pleural Fluid (Day +2): GS: Few WBCs, Cx: NG                                                                                                                                                                           | - Concordant,<br>- Microbe of unclear clinical significance                                                 |
|   | 11 | Micro-SI | Pass | 586.6  | <i>Escherichia coli</i> , 228<br><i>Prevotella bivia</i> , 96                                                                                        | - Blood (Day 0):<br><i>Staphylococcus capitis</i>                                                                                                                                                                        | - Culture not available<br>-- concordant with prior infection<br>- Microbe of unclear clinical significance |
|   | 27 | Micro-SI | Pass | 86.0   | <i>Pseudomonas aeruginosa</i> , 1101<br><i>Escherichia coli</i> , 381<br><i>Human herpesvirus 1</i> , 95<br><i>Burkholderia cepacia complex</i> , 58 | - BAL (Day 0): GS:<br>Many WBCs, Many GNRs Cx: Heavy<br><i>Pseudomonas aeruginosa</i><br>- Stool (Day 0): PCR:<br><i>C. difficile</i> ND<br>- Blood: (Day +1): NG                                                        | - Concordant,<br>- Microbe of unclear clinical significance                                                 |
| 5 | 1  | Micro-SI | Fail | 887.9  | NA                                                                                                                                                   | - BAL (Day +2): GS:<br>Many WBCs, Few GNR, Rare GPCP, Rare GPCCH, Cx:<br><i>Klebsiella aerogenes</i> (>100,000 cfu/mL), MSSA (52,000 cfu/mL)                                                                             | - Comparison not possible                                                                                   |
|   | 5  | Micro-SI | Fail | 4306.1 | NA                                                                                                                                                   | - Blood (Day -2):<br>Fungitell: ND<br>- Stool (Day +2):<br>PCR: <i>C. difficile</i> Detected                                                                                                                             | - Comparison not possible                                                                                   |
|   | 10 | Micro-SI | Fail | 6076.6 | NA                                                                                                                                                   | - ETA (Day -1): GS:<br>Few WBCs, Cx: Light<br><i>Klebsiella aerogenes</i> , Rare MSSA, Rare NRF<br>- Blood (Day -1): NG<br>- BAL (Day 0): GS:<br>Many WBCs, Cx:<br><i>Klebsiella aerogenes</i> (60,000 cfu/mL), Yeast    | - Comparison not possible                                                                                   |
| 6 | 1  | Micro-SI | Pass | 613.3  | <i>Proteus mirabilis</i> , 32205                                                                                                                     | - Blood (Day +1):<br><i>Staphylococcus epidermidis</i><br>- Urine (Day +1): Cx:                                                                                                                                          | - Concordant                                                                                                |



|           |    |                 |      |        |                                                                                                   |                                                                                                                                                                                                                                                               |                                                                                     |
|-----------|----|-----------------|------|--------|---------------------------------------------------------------------------------------------------|---------------------------------------------------------------------------------------------------------------------------------------------------------------------------------------------------------------------------------------------------------------|-------------------------------------------------------------------------------------|
|           |    |                 |      |        |                                                                                                   | <i>Proteus mirabilis</i><br>(80,000 Col/mL),<br>Yeast                                                                                                                                                                                                         |                                                                                     |
|           | 5  | Micro-SI        | Pass | 880.7  | <i>Proteus mirabilis</i> ,<br>409005<br><i>Human herpesvirus</i><br>4, 291                        | - Parotid gland<br><u>drainage</u> (Day +5):<br>GS: No WBCs or<br>organisms; Cx: Light<br>MRSA, Rare <i>Proteus</i><br><i>mirabilis</i> , Light<br><i>Corynebacterium</i><br><i>tuberculostearicum</i> ,<br>Rare<br><i>Corynebacterium</i><br><i>striatum</i> | - Concordant,<br>- Microbe of unclear<br>clinical significance                      |
| <b>7</b>  | 1  | Micro-SI        | Fail | 1343.1 | NA                                                                                                | - BAL (Day 0): GS:<br>Moderate WBCs, Cx:<br>NRF                                                                                                                                                                                                               | - Comparison not<br>possible                                                        |
|           | 5  | Clinical-SI     | Pass | 61.6   | <i>Candida tropicalis</i> ,<br>544                                                                | - BAL (Day -1): GS:<br>No WBCs, Cx: Rare<br>NRF                                                                                                                                                                                                               | - Microbe of unclear<br>clinical significance                                       |
|           | 10 | Clinical-SI     | Pass | 177.8  | <i>Candida tropicalis</i> ,<br>2171<br><i>Human herpesvirus</i><br>1, 1013                        | - BAL (Day +2): GS:<br>No WBCs, Cx: Yeast                                                                                                                                                                                                                     | - Microbe of unclear<br>clinical significance                                       |
| <b>8</b>  | 1  | Micro-SI        | Fail | 4274.9 | NA                                                                                                | - Blood (Day +1): NG<br>- Urine (Day +1): Cx:<br>multiple organisms,<br>likely contaminated<br>- Sputum (Day +1):<br>GS: Moderate WBCs,<br>Cx: Rare NRF                                                                                                       | - Comparison not<br>possible                                                        |
| <b>9</b>  | 1  | Clinical-SI     | Fail | 1213.0 | NA                                                                                                | - BAL (Day +2): GS:<br>Many WBCs,<br>Moderate GPCP,<br>Moderate GPCCH;<br>Cx: NRF                                                                                                                                                                             | - Concordant                                                                        |
|           | 5  | Clinical-SI     | Fail | 1150.3 | NA                                                                                                | - BAL (Day -2): GS:<br>Many WBCs,<br>Moderate GPCP,<br>Moderate GPCCH,<br>Cx: NRF<br>- Blood (Day 0): NG                                                                                                                                                      | - Concordant                                                                        |
|           | 10 | Clinical-SI     | Pass |        | <i>Candida tropicalis</i> ,<br>112                                                                | - Blood (Day +1): NG                                                                                                                                                                                                                                          | - Microbe of unclear<br>clinical significance                                       |
| <b>10</b> | 1  | Clinical-SI     | Pass | 38.8   | No Organism<br>Reported, 0                                                                        | - Blood (Day -2): NG<br>- Sputum (Day +1):<br>GS: Rare WBCs, Cx:<br>NG                                                                                                                                                                                        | - Concordant                                                                        |
|           | 5  | No-Suspected-SI | Pass | 592.5  | No Organism<br>Reported, 0                                                                        |                                                                                                                                                                                                                                                               | - Comparison not<br>possible                                                        |
|           | 10 | No-Suspected-SI | Pass | 342.6  | <i>Human herpesvirus</i><br>1, 110                                                                |                                                                                                                                                                                                                                                               | - Microbe of unclear<br>clinical significance                                       |
| <b>11</b> | 1  | Clinical-SI     | Pass | 349.6  | <i>Klebsiella</i><br><i>pneumoniae</i> , 24841<br><i>Pseudomonas</i><br><i>aeruginosa</i> , 12119 | -Blood (Day +2): NG                                                                                                                                                                                                                                           | - Plausible pathogen<br>identified<br>- Microbe of unclear<br>clinical significance |

|    |    |                 |      |         |                                                                                                          |                                                                                                                    |                                                                                                                                                                                           |                                            |
|----|----|-----------------|------|---------|----------------------------------------------------------------------------------------------------------|--------------------------------------------------------------------------------------------------------------------|-------------------------------------------------------------------------------------------------------------------------------------------------------------------------------------------|--------------------------------------------|
|    |    |                 |      |         |                                                                                                          | <i>Pediococcus acidilactici</i> , 2800<br><i>Human herpesvirus 4</i> , 574                                         |                                                                                                                                                                                           |                                            |
|    | 5  | Clinical-SI     | Pass | 690.5   |                                                                                                          | <i>Klebsiella pneumoniae</i> , 4073<br><i>Enterococcus faecalis</i> , 7331<br><i>Pseudomonas aeruginosa</i> , 5413 | - Stool (Day 0): PCR:<br><i>C. difficile</i> ND                                                                                                                                           | - Plausible pathogen identified            |
| 12 | 1  | Clinical-SI     | Fail | 551.7   | NA                                                                                                       |                                                                                                                    | - Stool (Day -1): PCR:<br><i>C. difficile</i> ND                                                                                                                                          | - Comparison not possible                  |
|    | 5  | Clinical-SI     | Pass | 82.9    | No Organism Reported, 0                                                                                  |                                                                                                                    |                                                                                                                                                                                           | - Comparison not possible                  |
|    | 10 | No-Suspected-SI | Pass | 65.3    | <i>Escherichia coli</i> , 763                                                                            |                                                                                                                    |                                                                                                                                                                                           | - Plausible pathogen identified            |
|    | 67 | Micro-SI        | Fail | 9803.8  | NA                                                                                                       |                                                                                                                    | - BAL (Day -7): GS:<br>Few WBCs, Few GPCPCs, Cx:<br><i>Klebsiella pneumoniae</i> , NRF                                                                                                    | - Comparison not possible                  |
| 13 | 1  | Clinical-SI     | Fail | 11870.3 | NA                                                                                                       |                                                                                                                    | - Urine (Day -2): Cx:<br>NG (1,000 - 10,000 col/ml mixed growth of 3 or more organisms)<br>- Blood (Day -1): NG<br>- Blood (Day +2): NG<br>- Sputum (Day +2): GS: Few WBCs, Cx: Light NRF | - Comparison not possible                  |
|    | 5  | Clinical-SI     | Fail | 12444.5 | NA                                                                                                       |                                                                                                                    | - Blood (Day -2): NG<br>- Sputum (Day -2): GS: Few WBCs, Cx: Light NRF<br>- Blood (Day 0): NG<br>- Sputum (Day 0): GS: Few WBCs, Cx: Rare NRF                                             | - Comparison not possible                  |
|    | 10 | Clinical-SI     | Fail | 11195.5 | NA                                                                                                       |                                                                                                                    | - Blood (Day -1): NG                                                                                                                                                                      | - Comparison not possible                  |
| 14 | 1  | Clinical-SI     | Pass | 119.8   | No Organism Reported, 0                                                                                  |                                                                                                                    |                                                                                                                                                                                           | - Comparison not possible                  |
|    | 5  | No-Suspected-SI | Pass | 42.6    | No Organism Reported, 0                                                                                  |                                                                                                                    |                                                                                                                                                                                           | - Comparison not possible                  |
| 15 | 1  | Clinical-SI     | Pass | 200.3   | <i>Human herpesvirus 1</i> , 2435<br><i>Streptococcus thermophilus</i> , 128<br><i>Pantoea atis</i> , 63 |                                                                                                                    | - Blind BAL (Day -2): GS: Few WBCs, Cx: 4200 cfu/mL, GNR<br>No ID or sensitivity performed, Yeast                                                                                         | - Microbe of unclear clinical significance |
| 16 | 1  | Clinical-SI     | Pass | 319.9   | No Organism Reported, 0                                                                                  |                                                                                                                    | - Blood (Day 0): NG<br>- RCx (Day +2): Cx: NRF                                                                                                                                            | - Concordant                               |
|    | 5  | Clinical-SI     |      |         |                                                                                                          |                                                                                                                    |                                                                                                                                                                                           | - Comparison not possible                  |
| 17 | 1  | Clinical-SI     | Pass | 30.8    | No Organism                                                                                              |                                                                                                                    | - Blood (Day -2): NG                                                                                                                                                                      | - Concordant                               |

|    |    |                 |                    |        |                                                                                                                                                                                             |                                                                                                                                             |
|----|----|-----------------|--------------------|--------|---------------------------------------------------------------------------------------------------------------------------------------------------------------------------------------------|---------------------------------------------------------------------------------------------------------------------------------------------|
|    |    |                 |                    |        | Reported, 0                                                                                                                                                                                 | - Urine (Day -1): Cx:<br>NG                                                                                                                 |
| 18 | 1  | Clinical-SI     | Fail               |        | NA                                                                                                                                                                                          | - Comparison not possible                                                                                                                   |
| 19 | 1  | Clinical-SI     | Pass               | 332.0  | No Organism<br>Reported, 0                                                                                                                                                                  | - Comparison not possible                                                                                                                   |
|    | 5  | Clinical-SI     |                    |        |                                                                                                                                                                                             | - RCx (Day 0): Cx:<br>Yeast - Comparison not possible                                                                                       |
|    | 10 | No-Suspected-SI |                    |        |                                                                                                                                                                                             | - Blood (Day -2): NG<br>- Urine (Day -2): Cx:<br>NG - Comparison not possible<br>- RCx (Day -2): Cx:<br>NRF<br>- RCx (Day +1): Cx:<br>Yeast |
| 20 | 1  | Clinical-SI     | Pass Qualitatively | 599.7  | <i>Human herpesvirus 4</i>                                                                                                                                                                  | - Microbe of unclear clinical significance                                                                                                  |
|    | 5  | Clinical-SI     |                    |        |                                                                                                                                                                                             | - RCx (Day 0): Cx:<br>NRF - Comparison not possible                                                                                         |
|    | 10 | Clinical-SI     |                    |        |                                                                                                                                                                                             | - Comparison not possible                                                                                                                   |
| 21 | 1  | Clinical-SI     | Pass               | 77.0   | <i>Human herpesvirus 4, 388</i><br><i>Bacteroides ovatus, 51</i>                                                                                                                            | - RCx (Day 0): Cx:<br>NRF - Microbe of unclear clinical significance                                                                        |
| 22 | 1  | No-Suspected-SI | Fail               | 2836.1 | NA                                                                                                                                                                                          | - Blood (Day -2): NG<br>- Urine (Day -2): Cx:<br>NG - Comparison not possible                                                               |
| 23 | 1  | No-Suspected-SI | Pass               | 133.6  | <i>Raoultella ornithinolytica, 1481</i>                                                                                                                                                     | - Microbe of unclear clinical significance                                                                                                  |
|    | 5  | No-Suspected-SI | Pass               | 47.6   | <i>Candida tropicalis, 89</i>                                                                                                                                                               | - Blood (Day -1): NG - Microbe of unclear clinical significance                                                                             |
| 24 | 1  | No-Suspected-SI | Pass               | 563.5  | No Organism<br>Reported, 0                                                                                                                                                                  | - Blood (Day -2): NG - Concordant                                                                                                           |
| 25 | 1  | No-Suspected-SI | Pass Qualitatively | 1299.7 | <i>Pseudomonas aeruginosa,</i><br><i>Streptococcus mitis,</i><br><i>Klebsiella variicola,</i><br><i>Staphylococcus aureus,</i>                                                              | - Blood (Day -2): NG - Plausible pathogen identified                                                                                        |
| 26 | 1  | No-Suspected-SI | Pass               | 424.2  | <i>Klebsiella pneumoniae, 1673</i><br><i>Haemophilus parahaemolyticus, 1132</i><br><i>Haemophilus influenzae, 1022</i><br><i>Escherichia coli, 587</i><br><i>Enterococcus faecalis, 226</i> | - Plausible pathogen identified                                                                                                             |
|    | 5  | No-Suspected-SI | Pass Qualitatively | 4711.9 | <i>Human herpesvirus 4,</i><br><i>Klebsiella pneumoniae,</i>                                                                                                                                | - Blood (Day -1): NG - Plausible pathogen identified<br>- Microbe of unclear clinical significance                                          |

|    |    |                 |                    |         |                                                                                                                                                                                          |                                                                                                           |                                                                               |
|----|----|-----------------|--------------------|---------|------------------------------------------------------------------------------------------------------------------------------------------------------------------------------------------|-----------------------------------------------------------------------------------------------------------|-------------------------------------------------------------------------------|
| 27 | 1  | No-Suspected-SI | Pass               | 1229.0  | Human herpesvirus 4, 220                                                                                                                                                                 |                                                                                                           | - Microbe of unclear clinical significance                                    |
|    | 5  | No-Suspected-SI | Pass               | 345.4   | Human herpesvirus 4, 619<br>Staphylococcus epidermidis, 200<br>Scardovia wiggisiae, 232                                                                                                  |                                                                                                           | - Microbe of unclear clinical significance                                    |
|    | 10 | No-Suspected-SI | Pass               | 386.5   | Human herpesvirus 4, 164                                                                                                                                                                 |                                                                                                           | - Microbe of unclear clinical significance                                    |
| 28 | 1  | No-Suspected-SI | Pass               | 2253.5  | Human herpesvirus 4, 1863                                                                                                                                                                | - Blood (Day -3): NG<br>- Urine (Day -2): Cx: NG                                                          | - Microbe of unclear clinical significance                                    |
| 29 | 1  | No-Suspected-SI | Pass               | 373.1   | Streptococcus parasanguinis, 505<br>Actinomyces odontolyticus, 270<br>Streptococcus gordonii, 205<br>Streptococcus sanguinis, 147<br>Rothia mucilaginosa, 88                             |                                                                                                           | - Plausible pathogen identified<br>- Microbe of unclear clinical significance |
| 30 | 5  | No-Suspected-SI | Pass Qualitatively | 24326.7 | Corynebacterium striatum,<br>Pseudomonas aeruginosa,<br>Human herpesvirus 4,                                                                                                             | - Bronchial Wash (Day -1): GS: Many WBCs, Many GNR, Many GPR, Cx: Heavy Pseudomonas aeruginosa, Heavy NRF | - Plausible pathogen identified<br>- Microbe of unclear clinical significance |
| 31 | 1  | No-Suspected-SI | Pass               | 91.3    | Klebsiella pneumoniae, 554<br>Staphylococcus aureus, 228<br>Haemophilus influenzae, 57                                                                                                   |                                                                                                           | - Plausible pathogen identified                                               |
| 32 | 1  | No-Suspected-SI | Pass               | 81.8    | Actinomyces graevenitzii, 123<br>Helicobacter pylori, 121<br>Rothia mucilaginosa, 120<br>Streptococcus parasanguinis, 112<br>Streptococcus salivarius, 104<br>Streptococcus gordonii, 84 | - Blood (Day -1): NG                                                                                      | - Plausible pathogen identified<br>- Microbe of unclear clinical significance |
| 33 | 1  | No-Suspected-SI | Fail               | 1011.1  | NA                                                                                                                                                                                       | - BAL (Day 0): GS: Moderate WBCs, Few GPCP, Cx: NRF                                                       | - Comparison not possible                                                     |
|    | 6  | No-Suspected-SI | Pass Qualitatively | 973.8   | Candida tropicalis                                                                                                                                                                       |                                                                                                           | - Microbe of unclear clinical significance                                    |
|    | 10 | No-Suspected-SI | Pass Qualitatively | 1546.6  | Candida tropicalis                                                                                                                                                                       | - BAL (Day -1): GS: Few WBCs, Cx: Yeast , NRF                                                             | - Microbe of unclear clinical significance                                    |

|    |    |                 |                    |         |                                        |  |                                                                                                                                                                                                       |                                            |
|----|----|-----------------|--------------------|---------|----------------------------------------|--|-------------------------------------------------------------------------------------------------------------------------------------------------------------------------------------------------------|--------------------------------------------|
|    |    |                 |                    |         |                                        |  | - Blood (Day 0): NG                                                                                                                                                                                   |                                            |
| 34 | 1  | No-Suspected-SI | Fail               | 15218.0 | NA                                     |  | - Blood (Day -2): NG                                                                                                                                                                                  | - Comparison not possible                  |
|    | 5  | No-Suspected-SI | Fail               | 14729.6 | NA                                     |  |                                                                                                                                                                                                       | - Comparison not possible                  |
|    | 10 | No-Suspected-SI | Fail               | 3913.3  | NA                                     |  | - Blood (Day -1): NG<br>- Sputum (Day -1): GS: Moderate GPCP, Few WBCs, Few Yeast, Few GPR, Cx: Heavy NRF                                                                                             | - Comparison not possible                  |
| 35 | 1  | No-Suspected-SI | Fail               | 591.5   | NA                                     |  |                                                                                                                                                                                                       | - Comparison not possible                  |
|    | 5  | Clinical-SI     | Fail               | 632.2   | NA                                     |  | - ETA (Day -1): GS: Few WBCs, Rare GPCP, Moderate NRF<br>- ETA (Day +2): GS: Few GPCP, Few GPR, Few GNR, Few WBCs, Cx: Moderate NRF                                                                   | - Comparison not possible                  |
|    | 10 | Clinical-SI     | Fail               | 270.0   | NA                                     |  | - Blood (Day -2): NG<br>- Sputum (Day -2): GS: Few GPCP, Few GNR, Few WBCs, Rare GPR, Cx: Heavy NRF<br>- BAL (Day -2): GS: Few WBCs, Rare GPCP, Rare GPR, Rare GNR, Cx: NRF; ND legionella Cx, ND RVP | - Comparison not possible                  |
| 36 | 1  | No-Suspected-SI | Pass Qualitatively | 686.2   | <i>Escherichia coli</i>                |  | - Blood (Day -1): NG<br>- Urine (Day -1): Cx: NG<br>- Blood (Day +2): NG                                                                                                                              | - Plausible pathogen identified            |
|    | 5  | No-Suspected-SI | Pass               | 362.7   | <i>Human herpesvirus 1, 2565</i>       |  |                                                                                                                                                                                                       | - Microbe of unclear clinical significance |
| 37 | 1  | No-Suspected-SI | Fail               | 3188.8  | NA                                     |  | - Blood (Day -2): NG, PCR: CMV ND<br>- Urine (Day -1): Cx: NG<br>- Urine (Day -1): Ag: Legionella ND                                                                                                  | - Comparison not possible                  |
|    | 5  | No-Suspected-SI | Pass               | 2792.4  | No Organism Reported, 0                |  |                                                                                                                                                                                                       | - Comparison not possible                  |
| 38 | 1  | No-Suspected-SI | Pass               | 148.7   | <i>Staphylococcus epidermidis, 808</i> |  | - Blood (Day -1): NG<br>- BAL (Day -1): GS: Rare WBCs, GPCP, NRF                                                                                                                                      | - Microbe of unclear clinical significance |
|    | 5  | No-Suspected-SI | Pass               | 122.2   | <i>Staphylococcus epidermidis, 485</i> |  |                                                                                                                                                                                                       | - Microbe of unclear clinical significance |
|    | 10 | Micro-SI        | Pass               | 163.7   | <i>Enterococcus faecalis, 712</i>      |  | - Blood (Day -2): NG<br>- Urine (Day -2): Cx:                                                                                                                                                         | - Concordant                               |

|    |   |                 |                    |        |  |                                                                                                                       |                                                                                             |                                            |
|----|---|-----------------|--------------------|--------|--|-----------------------------------------------------------------------------------------------------------------------|---------------------------------------------------------------------------------------------|--------------------------------------------|
|    |   |                 |                    |        |  | <i>Prevotella denticola</i> ,<br>170<br><i>Lactobacillus gasseri</i> ,<br>157<br><i>Prevotella oris</i> , 148         | <i>Enterococcus faecalis</i><br>- BAL (Day -2): GS:<br>Rare WBCs, Rare<br>GPCP, Cx: NRF     |                                            |
| 39 | 1 | No-Suspected-SI | Pass               | 148.6  |  | <i>Rothia mucilaginosa</i> ,<br>157                                                                                   | - Blood (Day -2): NG                                                                        | - Microbe of unclear clinical significance |
| 40 | 1 | No-Suspected-SI | Pass               | 139.7  |  | <i>Human herpesvirus</i><br>4, 149                                                                                    |                                                                                             | - Microbe of unclear clinical significance |
| 41 | 1 | No-Suspected-SI | Pass Qualitatively | 722.2  |  | <i>Lactobacillus gasseri</i>                                                                                          |                                                                                             | - Microbe of unclear clinical significance |
| 42 | 1 | No-Suspected-SI | Pass               | 8340.9 |  | <i>Staphylococcus epidermidis</i> , 3036<br><i>Human herpesvirus</i><br>4, 889<br><i>Helicobacter pylori</i> ,<br>345 | - Blood (Day -2): NG<br>- Urine (Day -2): Ag:<br>Streptococcus pneumonia &<br>Legionella ND | - Microbe of unclear clinical significance |

493 Abbreviations: Not detected (ND); no growth (NG); normal respiratory flora (NRF); gram stain (GS); culture (Cx); gram negative rods (GNRs); gram  
494 positive cocci in chains (GPCCH); gram positive cocci in pairs (GPCP); T2 Candida fungal test (T2).

495

496 e-Table 3: Microbial species classifications

| Taxon                               | Class                                    | Anatomic Compartment    |
|-------------------------------------|------------------------------------------|-------------------------|
| <i>Actinomyces graevenitzi</i>      | Recognized pathogen                      | Oral                    |
| <i>Actinomyces odontolyticus</i>    | Recognized pathogen                      | Oral                    |
| <i>Bacteroides ovatus</i>           | Microbe with unclear clinical importance | GI                      |
| <i>Bacteroides vulgatus</i>         | Microbe with unclear clinical importance | GI                      |
| <i>Burkholderia cepacia complex</i> | Recognized pathogen                      | Respiratory, Nosocomial |
| <i>Candida parapsilosis</i>         | Microbe with unclear clinical importance | Skin, GI                |
| <i>Candida tropicalis</i>           | Microbe with unclear clinical importance | Skin, GI                |
| <i>Corynebacterium striatum</i>     | Microbe with unclear clinical importance | Skin                    |
| <i>Enterococcus faecalis</i>        | Recognized pathogen                      | GI                      |
| <i>Enterococcus faecium</i>         | Recognized pathogen                      | GI                      |
| <i>Escherichia coli</i>             | Recognized pathogen                      | GI                      |
| <i>Haemophilus influenzae</i>       | Recognized pathogen                      | Oral                    |
| <i>Haemophilus parahaemolyticus</i> | Microbe with unclear clinical importance | Oral                    |
| <i>Helicobacter pylori</i>          | Microbe with unclear clinical importance | GI                      |
| <i>Human herpesvirus 1</i>          | Microbe with unclear clinical importance | Unknown                 |
| <i>Human herpesvirus 4</i>          | Microbe with unclear clinical importance | Unknown                 |

|                                    |                                          |                           |
|------------------------------------|------------------------------------------|---------------------------|
| <i>Klebsiella pneumoniae</i>       | Recognized pathogen                      | Oral, GI                  |
| <i>Klebsiella variicola</i>        | Recognized pathogen                      | GI                        |
| <i>Lactobacillus gasseri</i>       | Microbe with unclear clinical importance | GI                        |
| <i>Pantoea ananatis</i>            | Microbe with unclear clinical importance | Unknown                   |
| <i>Pediococcus acidilactici</i>    | Microbe with unclear clinical importance | GI                        |
| <i>Prevotella bivia</i>            | Microbe with unclear clinical importance | Oral                      |
| <i>Prevotella denticola</i>        | Microbe with unclear clinical importance | Oral                      |
| <i>Prevotella oris</i>             | Microbe with unclear clinical importance | Oral                      |
| <i>Proteus mirabilis</i>           | Recognized pathogen                      | GI                        |
| <i>Pseudomonas aeruginosa</i>      | Recognized pathogen                      | GI, Pulmonary, Nosocomial |
| <i>Raoultella ornithinolytica</i>  | Recognized pathogen                      | GI                        |
| <i>Rothia mucilaginosa</i>         | Microbe with unclear clinical importance | Oral                      |
| <i>Staphylococcus aureus</i>       | Recognized pathogen                      | Skin                      |
| <i>Staphylococcus epidermidis</i>  | Microbe with unclear clinical importance | Skin                      |
| <i>Streptococcus gordonii</i>      | Microbe with unclear clinical importance | Oral                      |
| <i>Streptococcus infantarius</i>   | Microbe with unclear clinical importance | Oral                      |
| <i>Streptococcus mitis</i>         | Recognized pathogen                      | Oral, Skin                |
| <i>Streptococcus parasanguinis</i> | Recognized pathogen                      | Oral                      |
| <i>Streptococcus salivarius</i>    | Microbe with unclear clinical importance | Oral                      |
| <i>Streptococcus sanguinis</i>     | Microbe with unclear clinical importance | Oral                      |
| <i>Streptococcus thermophilus</i>  | Microbe with unclear clinical importance | Oral                      |
| <i>Scardovia wiggisiae</i>         | Microbe with unclear clinical importance | Oral                      |

497
